1 WD 40 domain of RqkA regulates its kinase activity and role in extraordinary radioresistance  
2 in *Deinococcus radiodurans*  
3

4 Dhirendra Kumar Sharma<sup>1</sup>, Subhash C. Bihani<sup>2</sup>, Hari S Misra<sup>1,3</sup><sup>§</sup>, Yogendra S. Rajpurohit<sup>1, 3</sup><sup>#</sup>  
5

6 <sup>1</sup>Molecular Biology Division,<sup>2</sup>Radiation Biology and Health Science Division, Bhabha  
7 Atomic Research Centre, Mumbai- 400085, India

8 <sup>3</sup>Homi Bhabha National Institute (DAE- Deemed University), Mumbai- 400094, India  
9

10 **Running title:**

11 WD40 domain role in STPK activity regulation  
12

13 **# Corresponding author and address**

14 Dr. Yogendra Singh Rajpurohit

15 2-46-S, Modular Lab, A-block,

16 Molecular Biology Division,

17 Bhabha Atomic Research Centre

18 Mumbai- 400085

19 Telephone (+91-22) 2559-0387

20 Fax: 91-22-25505151 (EN 23496)

21 Email : [ysraj@barc.gov.in](mailto:ysraj@barc.gov.in)  
22

23 **Keywords:** *Deinococcus*, Serine /Threonine protein kinase, protein phosphorylation,  
24 radioresistance, signal transduction, WD40 domain,  $\beta$  propeller  
25

26 **Conflict of Interest:** Authors have no conflict of interest on the content of manuscript.  
27

28 Footnote: <sup>§</sup> Dr. H S Misra share co-corresponding authorship.  
29  
30  
31  
32  
33  
34

35 **Summary:**

36 RqkA, a DNA damage responsive Serine / Threonine kinase is characterized for its role in  
37 DNA repair and cell division in *D. radiodurans*. It has a unique combination of a kinase  
38 domain at N-terminus and a WD40 type domain at C-terminus joined through a linker. WD40  
39 domain is comprised of eight  $\beta$  propeller repeats held together via “tryptophan-docking  
40 motifs” and forming a typical ‘velcro’ closure structure. RqkA mutants lacking the WD40  
41 region (hereafter referred to as WD mutant) could not complement RqkA loss in  $\gamma$  radiation  
42 resistance in *D. radiodurans* and lacked  $\gamma$  radiation mediated activation of kinase activity *in*  
43 *vivo*. WD mutants failed to phosphorylate its cognate substrate (e.g. DrRecA) in surrogate *E.*  
44 *coli* cells. Further, unlike wild type enzyme, the kinase activity of its WD40 mutants was not  
45 stimulated by Pyrroloquinoline quinone (PQQ) indicating the role of the WD motifs in PQQ  
46 interaction and stimulation of its kinase activity. Together, results highlighted the importance  
47 of the WD40 domain in the regulation of RqkA kinase signaling functions *in vivo* and thus  
48 the role of WD40 domain in the regulation of any STPK is the first time demonstrated in  
49 bacteria.

50

51 **Importance:**

52 This study highlights the importance of the WD40 domain in activity regulation and signaling  
53 activity of bacterial serine/ threonine kinase for the first time in the bacterial response to  
54 gamma radiation and DNA damage.

55

56

57

## 58 **Introduction:**

59 Reversible protein phosphorylation plays an important role in transmitting extracellular  
60 signals to molecular levels by affecting numerous macromolecular events in the cell (Kobir *et*  
61 *al.*, 2011). The homeostasis of this process is regulated by the regulated action of protein  
62 kinases and phosphatases (Kennelly *et al.*, 1996). The most common types of  
63 phosphorylation found in proteins are on the side chains of serine/threonine, tyrosine,  
64 histidine, and aspartate residues (Hanks & Hunter, 1995). The molecular events involved in  
65 protein phosphorylation and dephosphorylation in response to DNA damage are better  
66 understood in eukaryotes as compared to prokaryotes. In bacteria, two-component system  
67 (TCS) mediated by histidine kinase and cognate response regulator is a best characterized  
68 mechanism of protein phosphorylation mediated signal transduction processes to molecular  
69 levels (Parkinson, 1993, Dutta *et al.*, 1999, Gao & Stock, 2009, Desai *et al.*, 2011, Wang *et*  
70 *al.*, 2008). Apart from TCS, the other mechanism of protein phosphorylation  
71 /dephosphorylation involves hank type serine threonine/tyrosine protein kinases (ST/YPKs),  
72 which phosphorylate proteins at serine, threonine and tyrosine residues (Hanks *et al.*, 1988).  
73 These ST/YPKs are known to regulate several key processes in bacterial physiology viz;  
74 abiotic stress adaptation (Pereira *et al.*, 2011, Molle & Kremer, 2010), cell morphogenesis  
75 (Macek *et al.*, 2007) and cell cycle regulation in response to DNA damage (Garcia-Garcia *et*  
76 *al.*, 2016, Rajpurohit & Misra, 2010). Typically, the catalytic core of such STPK folds into  
77 the two-lobed structure and the catalytic active site located in a deep cleft formed between  
78 two lobes. This type of structural conservation of the catalytic domain is found in these  
79 kinases characterized across the biological systems (Hanks *et al.*, 1988). Proteins kinases  
80 behave like a molecular switch that exists in either an “off,” inactive state or an “on,” active  
81 state (Huse & Kuriyan, 2002). The transition between “on” and “off” state is controlled by  
82 diverse mechanisms including the binding of allosteric effectors and the sub-cellular  
83 localization. For the binding of allosteric effectors, STPKs catalytic domain joined with  
84 additional domains and these extra domains. Mostly, these extra domains regulate enzyme  
85 activity through ligand-protein and protein-protein interaction. For example, PASTA repeats  
86 that associate with PrkC of *B. subtilis* that involves in spore germination (Shah *et al.*, 2008)  
87 and PknB of *M. tuberculosis* and *S. aureus* regulate cell wall morphology (Barthe *et al.*,  
88 2010). Another type of extra domain is the C-terminal tetratricopeptide repeat domain  
89 (TPRD) found in PknG of *M. Tuberculosis* and involves in dimerization of this enzyme  
90 (Scherr *et al.*, 2007). Although, the rigid beta-propeller domains with central pore and the  
91 varying number of blades have been identified in some STPKs (Good *et al.*, 2004, Hu *et al.*,

92 2017), the ligand that would interact with these beta-propellers and its functional significance  
93 in the kinase activity regulation has not been studied in details.

94 *Deinococcus radiodurans* R1 (DEIRA) manage to survive the very high doses of DNA  
95 damaging agents including radiations with a negligible loss to its survival (Minton, 1994,  
96 Cox & Battista, 2005, Misra *et al.*, 2012). An efficient DNA double strand break (DSB)  
97 repair (Zahradka *et al.*, 2006) and a strong oxidative stress tolerance mechanism (Slade *et al.*,  
98 2009, Blasius *et al.*, 2008, Bihani *et al.*, 2018) have been implicated to the extreme  
99 phenotypes of this bacterium. In response to DNA damage; SOS mediated DNA damage  
100 repair and cell cycle regulation is a key survival mechanism for many bacteria (Shimoni *et*  
101 *al.*, 2009, Bolsunovsky *et al.*, 2016). Surprisingly, *D. radiodurans* is not benefitted from  
102 LexA/RecA mediated canonical SOS response (Bonacossa de Almeida *et al.*, 2002, Narumi  
103 *et al.*, 2001). Moreover, *D. radiodurans* cells can adjust its cellular response to DNA damage  
104 by gene expression change (Liu *et al.*, 2003, Tanaka *et al.*, 2004, Rajpurohit *et al.*, 2013c)  
105 and by employing novel transcription regulator IrrE (Earl *et al.*, 2002) / by novel molecular  
106 switch PprI (Hua *et al.*, 2003), by regulating the molecular interaction of cell division and  
107 genome segregation proteins (Misra *et al.*, 2018) and by adjusting its protein homeostasis  
108 (Joshi *et al.*, 2004). Earlier, we have shown that a radiation responsive Serine  
109 /Threoninekinase (RqkA) plays a key role in DNA damage response, DSB repair and cell  
110 cycle regulation in *D. radiodurans* (Rajpurohit & Misra, 2010, Rajpurohit & Misra, 2013a,  
111 Rajpurohit *et al.*, 2016, Maurya *et al.*, 2018, Sharma *et al.*, 2020). *D. radiodurans* cells  
112 devoid of *rqkA* become hypersensitive to  $\gamma$  radiation and lose DSB repair ability. The domain  
113 architecture of RqkA showed an STPK domain at N-terminal and an array of  $\beta$  propeller  
114 motifs in WD40 domain at C-terminal (hereafter referred to as WD40 domain), and both are  
115 held together by the flexible Juxta linker region (hereafter referred to as JLR). The role of  
116 kinase domain of RqkA in  $\gamma$  radiation resistance of *D. radiodurans* has been demonstrated  
117 earlier (Rajpurohit & Misra, 2010, Rajpurohit & Misra, 2013a). However, the role of WD40  
118 domain in RqkA function has not been studied yet and would be worth investigating. Here,  
119 we report the involvement of WD40 domain in the regulation of RqkA kinase function in  
120 response to  $\gamma$  radiation and the phosphorylation of its cognate substrate DrRecA. We  
121 demonstrated that WD40 domain deletion mutants of RqkA are severely compromised in  
122 RqkA functions in  $\gamma$  radiation survival and its activity stimulation by PQQ and gamma  
123 radiation. These results together suggested that PQQ interacts through WD40 domain, which  
124 seems to be responsible for both PQQ and gamma radiation response of RqkA in this

125 bacterium and highlights WD40 domain role in the regulation of RqkA functions in *D.*  
126 *radiodurans*.

127

## 128 **Results:**

129

### 130 **1. C-terminal domain of RqkA has structural properties of typical WD40 domain**

131 Raptor-X server was used to prepare the homology model of RqkA. The homology model of  
132 RqkA kinase showed the presence of two distinct domains connected through a long, flexible  
133 linker region (Fig. 1A). While the N-terminal domain (Residues 1-280) defines the STPK  
134 domain, the C-terminal domain (residues 305-668) folds into eight-bladed  $\beta$ -propeller  
135 structure belonging to the WD40 protein subfamily. Both domains joined by flexible JLR  
136 region (Residues from 281- 304). The N-terminal kinase domain shares all the structural  
137 features including the ATP binding site and other conserved motifs like P-loop, Helix-C,  
138 DFG motif, and catalytic loop as known in other Hank Type kinases (Hanks *et al.*, 1988).  
139 Important residues in the ATP binding site e.g. K42, N142, M154, D155 and the activation  
140 loop are conserved (Fig S1) “(for reviewers information only)”. Among these sites, K42 was  
141 tested as a kinase minus mutant of RqkA experimentally (Rajpurohit & Misra, 2013a). The  
142 C-terminal domain of RqkA folds into a super barrel structure consisting of eight four-  
143 stranded anti-parallel  $\beta$ -sheets arranged radially around a pseudo-eight-fold symmetry axis  
144 (Fig 1B). This structural arrangement is commonly known as  $\beta$ -propeller with four-stranded  
145 (A to D) anti-parallel  $\beta$ -sheets representing a blade of the propeller. By convention, each  $\beta$ -  
146 strand in a blade is labeled A through D with the A strand being closest to the pseudo-  
147 symmetry axis. Like many other WD40 proteins, RqkA WD40 domain creates a “velcro”  
148 closure of the ring by joining the first  $\beta$ -strand (strand D shown in blue in Fig. 1B) with the  
149 three strands from the last  $\beta$ -sheet *i.e.* blade no. 8 at C-terminus (A–C, shown in red in  
150 Fig.1B). Similar to other propellers, RqkA kinase propeller blades are connected through  
151 longer loops called “DA” loops. Among them, the DA loop connecting strand D5 to A6  
152 (shown in yellow in Fig. S2) “(for reviewers information only)” is relatively longer than other  
153 loops and protrudes out toward the top surface. The D strands also contain charged residue in  
154 the middle and a  $\beta$ -bulge created by the Trp-docking motif (Fig. 2C). The tryptophan residues  
155 present at the beginning of the D strand of blade form hydrogen-bonding interactions with the  
156 main chain of two neighboring blades and form a stabilizing girdle (Fig. S3) “(for reviewers  
157 information only)”. This type of arrangement of  $\beta$ -propeller maintain WD40 domain  
158 structural rigidity and provide large surface for protein-protein interaction (Albrecht & Zeth,

159 2011). Together, RqkA model featured it as a regulatory kinase and its WD40 domain with  
160 flexible JLR region may impart in its activity regulation.

161

## 162 **2. WD40 domain of RqkA kinase is required for its role in $\gamma$ radiation resistance in *D.*** 163 ***radiodurans***

164 Earlier, it was shown that the *rqkA* mutant of *D. radiodurans* became hypersensitive to  
165 gamma radiation and could not reassemble the shattered genome during its post-irradiation  
166 recovery (Rajpurohit & Misra, 2010). The K42A kinase mutant of RqkA had failed to  
167 complement RqkA loss in radioresistance of this bacterium (Rajpurohit & Misra, 2013a). The  
168 role of the WD40 domain in the regulation of the RqkA kinase function was further studied.  
169 Two variants of RqkA with only RqkA kinase domain ranging from 1-280 amino acids  
170 (hereafter referred to as RqkA<sup>KD</sup>) and RqkA kinase domain with JLR region from 1-305  
171 amino acids (hereafter referred as RqkA<sup>KDJ</sup>) were generated. These were expressed *in trans* in  
172 *rqkA* deletion mutant of *D. radiodurans* and functional complementation was compared with  
173 wild type RqkA (Fig. 2). The RqkA<sup>Wt</sup> complemented nearly complete to the loss of RqkA in  
174  $\gamma$  radiation resistance. However, both RqkA<sup>KDJ</sup> and RqkA<sup>KD</sup> variants that lacked the WD40  
175 domain but possess kinase domain with and without JLR linker respectively did not  
176 complement fully to RqkA loss of  $\gamma$  radiation resistance. Surprisingly, the  $\Delta$ *rqkA* cells  
177 expressing RqkA<sup>KD</sup> offers better support to  $\gamma$  radiation resistance than cells expressing  
178 RqkA<sup>KDJ</sup> (Fig. 2). These results signify the role of the WD40 domain in RqkA's *in vivo*  
179 functions. Curiously, the functional interaction of the separated domain of RqkA was also  
180 checked by co-expressing kinase and WD40 domain on the plasmid. These cells could not  
181 restore RqkA loss of radioresistance (data not given). Thus, the functional complementation  
182 studies suggested an important role of the WD40 domain of RqkA kinase in  $\gamma$  radiation  
183 resistance of *D. radiodurans* and highlighted the importance of kinase domain and WD40  
184 domain being together for RqkA function.

185

## 186 **3. PQQ is required for gamma radiation stimulation of RqkA phosphorylation**

187 RqkA is characterized as DNA damage and radiation responsive kinase with its ability to  
188 sense DNA damage resulting in activation of its autokinase activity (Rajpurohit & Misra,  
189 2010). The WD40 domain of RqkA has a similarity with the BamB protein of *E. coli* and  
190 methoxatin dehydrogenase of *Methanococcus* (Albrecht & Zeth, 2011, Anthony *et al.*, 1994).  
191 Methoxatin dehydrogenase of *Methanococcus* and ethanol dehydrogenase of *Pseudomonas*

192 interact with PQQ through their WD40 domain (Anthony *et al.*, 1994, Schrover *et al.*, 1993).  
193 The *D. radiodurans* cells synthesize PQQ and the mutant devoid of PQQ become sensitive to  
194 radioresistance and the DSB repair was arrested (Rajpurohit *et al.*, 2008). Here, we reasoned  
195 that PQQ, a known ligand of  $\beta$  propeller motifs in the WD40 domain might interact with it  
196 and could serve as a regulator of kinase function in RqkA. To test this hypothesis, the *in vivo*  
197 phosphorylation of *in trans* expressed wild type RqkA and its variants RqkA<sup>KD</sup> and RqkA<sup>KDJ</sup>  
198 were checked in 6kGy irradiated cells and compared with unirradiated SHAM controls. Total  
199 cell-free extracts of these cells were immunoprecipitated using RqkA antibodies and the  
200 phosphorylation status of immunoprecipitate was detected using phosphor-threonine epitope  
201 antibodies. Results showed that RqkA is phosphorylated in unirradiated cells (Fig. 3, Panel  
202 (A), lane UI), which increased further upon irradiation, and remained high till 3 h of post-  
203 irradiation recovery (PIR) period and then gradually decreases to background levels (Fig.3,  
204 (A), lane 1,3,5 PIR,  $\Delta r q k A$ ). Interestingly, RqkA expressed on plasmid showed  
205 phosphorylation in  $\Delta p q q E$  cells lacking PQQ under normal conditions. However, there was  
206 no stimulation of RqkA phosphorylation upon gamma radiation exposure and the typical  
207 kinetics of RqkA phosphorylation as seen in wild type cells during PIR was not observed in  
208 cells devoid of PQQ (Fig. 3, (A), lane 1,3,5 PIR,  $\Delta r q k A \Delta p q q E$ ). Stimulation of RqkA  
209 phosphorylation in response to  $\gamma$  radiation in *D. radiodurans* cells, while its absence when  
210 PQQ is not present (in  $\Delta r q k A \Delta p q q E$ ) would suggest that RqkA requires PQQ for its activity  
211 stimulation or in other words for signaling function in response to  $\gamma$  radiation.

212

#### 213 **4. WD40 domain regulates radiation responsiveness in the RqkA kinase function.**

214 Since PQQ interaction with RqkA was found to be through  $\beta$  propeller motifs in the WD40  
215 domain, the role of the WD40 domain in gamma radiation responsiveness of RqkA  
216 phosphorylation was hypothesized and examined. For that, the WD40 deletion mutants of  
217 RqkA i.e. RqkA<sup>KD</sup> and RqkA<sup>KDJ</sup> were checked for phosphorylation under normal and gamma  
218 stressed conditions. The RqkA<sup>KD</sup> variant showed weak phosphorylation signal under normal  
219 growth conditions but did not show  $\gamma$  radiation stimulation of RqkA phosphorylation under  
220 either  $\Delta r q k A$  or  $\Delta r q k A \Delta p q q E$  genetic backgrounds (Fig. 3, (C), lane 1,3,5 PIR ). Quite  
221 interestingly, it was observed that RqkA<sup>KDJ</sup> did not show phosphorylation under both normal  
222 and gamma stressed growth conditions (Fig. 3, E). The absence of kinase function in  
223 RqkA<sup>KDJ</sup> while residual activity in RqkA<sup>KD</sup> but both lack the  $\gamma$  radiation responsiveness  
224 supports the functional complementation results of  $\gamma$  radiation resistance. Together, these



225 results suggest the contribution of the WD40 domain in the regulation of  $\gamma$  radiation  
226 responsiveness of RqkA phosphorylation and functions *in vivo*.

227

## 228 **5. WD40 domain of RqkA is required for substrate phosphorylation**

229 The mechanism that has been attributed to RqkA role in  $\gamma$  radiation resistance and DSB repair  
230 of *D. radiodurans* is found to be the phosphorylation of DNA repair and cell division proteins  
231 including RecA and FtsZ, and differential regulation of their functions (Rajpurohit & Misra,  
232 2013a, Maurya *et al.*, 2018, Rajpurohit *et al.*, 2016, Sharma *et al.*, 2020). RecA is known to  
233 play an essential role in extraordinary radioresistance of *D. radiodurans* (Daly & Minton,  
234 1996, Kim & Cox, 2002). We checked the WD40 domain role in RqkA phosphorylation of  
235 DrRecA in the surrogate *E. coli* host. RqkA and its WD40 mutants; RqkA<sup>KD</sup> and RqkA<sup>KDJ</sup>  
236 showed interesting phosphorylation patterns of total *E. coli* proteins and DrRecA. For  
237 instance, the RqkA expressing *E. coli* could phosphorylate endogenous proteins along with  
238 autophosphorylation of RqkA, as detected by phospho-Ser/Thr epitope antibodies (Fig. 4, K).  
239 Surprisingly, when RqkA was expressed along with its cognate substrate RecA, the majority  
240 of the phosphorylation was seen in RqkA and RecA (Fig. 4, RqkA<sup>wt</sup>) indicating that RqkA  
241 seems to become more specific in the presence of its cognate substrate as detected by  
242 phospho-Ser/Thr epitope antibodies (Fig. 4, compare lanes K with RqkA<sup>wt</sup>). However, there  
243 was no phosphorylation of RecA in cells co-expressing with either RqkA<sup>KD</sup> or RqkA<sup>KDJ</sup>  
244 proteins (Fig. 4, lanes RqkA<sup>KD</sup> / RqkA<sup>KDJ</sup>). As expected, the RqkA<sup>KDJ</sup> mutant did not show  
245 autophosphorylation while autophosphorylation in the RqkA<sup>KD</sup> mutant has significantly  
246 reduced (Fig. 4). *E. coli* cells expressing empty *pRADgro* and *pET28a+* plasmids showed no  
247 phosphorylation of endogenous proteins (Fig. 4, V). These results suggested that the RqkA  
248 requires its WD40 domain for trans-kinase function on its cognate substrate implying its  
249 direct or indirect involvement in enzyme-substrate interaction.

250

## 251 **6. WD40 domain contributes to PQQ stimulation of RqkA kinase function**

252 PQQ was shown to physically interact with RqkA and stimulate its kinase function *in vitro*  
253 (Rajpurohit & Misra, 2010). Many bacterial dehydrogenases have also been characterized to  
254 interact with PQQ through conserved  $\beta$  propeller motifs and regulate enzyme activity  
255 (Anthony & Ghosh, 1998). However, the functional implications of PQQ interaction with  $\beta$   
256 propeller motifs in the WD40 domain of RqkA are not known. The RecA phosphorylation by  
257 RqkA or by its WD40 mutants RqkA<sup>KD</sup> and RqkA<sup>KDJ</sup> was checked in surrogate *E. coli* grown  
258 with and without PQQ (1 $\mu$ M). Results showed that RqkA could phosphorylate RecA, which



259 further enhanced when PQQ was supplemented (Fig. 5, RqkA<sup>Wt</sup> RecA). RqkA<sup>KDJ</sup> mutant  
260 could not phosphorylate RecA irrespective of the presence of PQQ (Fig. 5, RqkA<sup>KDJ</sup>RecA).  
261 Notably, RqkA<sup>KD</sup> mutant although showed a low level of RecA phosphorylation but did not  
262 improve in the presence PQQ (Fig. 5, RqkA<sup>KD</sup>RecA). These results suggested that the WD40  
263 domain of RqkA seems to be the site for PQQ interaction and plays a decisive role in PQQ  
264 regulation of RqkA kinase activity certainly in response to gamma radiation damage.

265

## 266 **Discussion**

267 *Deinococcus radiodurans* is best known for its extraordinary radioresistance with a D10 dose  
268 between 10-15kGy (Misra *et al.*, 2013, Slade *et al.*, 2009). This bacterium can resist nearly  
269 200 double-strand breaks and ~3000 single-strand breaks per genome produced by 5000 Gy  
270 gamma radiation without loss of cell viability (Cox & Battista, 2005). The extreme phenotype  
271 of this bacterium has been attributed to its ability to protect biomolecules from oxidative  
272 damage (Daly *et al.*, 2010) and efficient DSB repair (Zahradka *et al.*, 2006, Slade *et al.*,  
273 2009). Such a high dose of gamma radiation would produce a huge influx of oxidants causing  
274 damage to macromolecules leading to molecular responses and cell cycle regulation. Earlier,  
275 we had characterized the PQQ role in bacterial tolerance to the photodynamic effects of Rose  
276 Bengal (Khairnar *et al.*, 2003) and as an antioxidant and radioprotector *in vitro* (Misra *et al.*,  
277 2004). PQQ role in radioresistance and DSB repair was also shown in *D. radiodurans*  
278 (Rajpurohit *et al.*, 2008). Using PQQ as a molecular link, we characterized RqkA as a cell  
279 signaling kinase having an indispensable role in cell cycle regulation in this bacterium  
280 (Maurya *et al.*, 2018, Rajpurohit *et al.*, 2016, Rajpurohit & Misra, 2010, Rajpurohit & Misra,  
281 2013a, Sharma *et al.*, 2020). This work has gained a greater significance because of (i) the  
282 absence of LexA/RecA type canonical SOS response mechanism of bacterial DNA damage  
283 response and cell cycle regulation in this bacterium (Bonacossa de Almeida *et al.*, 2002,  
284 Narumi *et al.*, 2001), and (ii) any Ser/Thr protein kinase role in the bacterial response to  
285 DNA damage and cell cycle regulation is reported the first time.

286 The molecular signaling mechanism involving protein phosphorylation is ubiquitously  
287 recognized as an important regulatory process of rapid and reversible modification of the  
288 physio-chemical properties of a protein. This process triggers several possible consequences  
289 in protein biology like change in enzyme activity, oligomerization state, interaction with  
290 other proteins, subcellular localization or half-life (Kobir *et al.*, 2011). The involvement of  
291 protein kinases particularly Ser / Thr / Tyr kinase in cell cycle regulation and cellular  
292 differentiation have been extensively studied in eukaryotes (Zhou & Elledge, 2000). These

293 signaling events ensure the effectiveness of repair enzymes for an efficient DNA strand break  
294 repair or to the demise of the cells by a regulated mechanism such as apoptosis, ensuring the  
295 genomic stability of the organism (Sancar *et al.*, 2004). Bacteria, being a simple bag of  
296 metabolites can use extensive cellular signaling networks to coordinate with cellular  
297 functions. In bacteria, the majority of environmental signals are transduced through the two-  
298 component system (TCS) involving histidine kinase and cognate response regulator, of the  
299 signal-transduction pathway (Bourret & Silversmith, 2010, Oshima *et al.*, 2002). The STPKs  
300 are widespread in bacterial genomes (Leonard *et al.*, 1998) and their role in bacterial growth  
301 (Sasseti *et al.*, 2003, Fernandez *et al.*, 2006), virulence (Didier *et al.*, 2010), persistence and  
302 reactivation (Shah *et al.*, 2008), cell division and development (Molle & Kremer, 2010,  
303 Pereira *et al.*, 2011) have been extensively documented. Many bacteria-harboring multipartite  
304 genome systems have been identified and their genome composition is heavily represented by  
305 STPKs (Krupa & Srinivasan, 2005, Leonard *et al.*, 1998, Kennelly, 2002, Misra *et al.*, 2018).  
306 However, the studies on STPK roles in the bacterial response to DNA damage, repair and cell  
307 cycle regulation has been discovered very recently. RqkA has N-terminal STPK domain and  
308 C terminal WD40 domain with an array of  $\beta$  propeller motifs (Fig.1A). WD40 domain is  
309 widespread in eukaryotes and has been found associated with a structurally and functionally  
310 different class of proteins ranging from signal transduction mediated by G-protein (Wall *et*  
311 *al.*, 1995), transcription regulation (Mylona *et al.*, 2006), ubiquitin depended protein  
312 degradation (Skaar *et al.*, 2014) and chromatin modification (Zhang & Zhang, 2015). WD  
313 proteins were suggested to be rare in prokaryotes. However, recent studies have suggested the  
314 presence of WD domain in proteins across the bacterial kingdom (Hu *et al.*, 2017). Most  
315 well-known among them is BamB and PQQ dependent alcohol dehydrogenases (Albrecht &  
316 Zeth, 2011, Anthony & Ghosh, 1998). However, there is no study linking the WD domain to  
317 any specific function. This study shows for the first time that the presence of the WD domain  
318 in RqkA is crucial for the proper functioning of its N-terminal kinase domain. When we  
319 checked the role of the WD40 domain in RqkA function in  $\gamma$  radiation resistance in *D.*  
320 *radiodurans* and the phosphorylation of its cognate substrate, the WD40 domain mutants;  
321 RqkA<sup>KDJ</sup> and RqkA<sup>KD</sup> failed to complement RqkA loss of  $\gamma$  radiation resistance as well  
322 activity stimulation in response to  $\gamma$  radiation (Fig. 2, 3). These results suggested the  
323 requirement of the WD40 domain in RqkA kinase function in  $\gamma$  radiation resistance in *D.*  
324 *radiodurans*. It may be highlighted that RqkA<sup>KDJ</sup> and RqkA<sup>KD</sup> which are different by the  
325 juxta-linker region (JLR), behaved differentially in functional complementation of RqkA  
326 loss. The JLR region of many eukaryotic receptor tyrosine kinases (c-Kit, EphB2 and Flt3)

327 has an autoinhibitory role by blocking the substrate access to a nucleotide-binding pocket of  
328 kinase domain by phosphorylation of key tyrosine residues within JLR region (Chan *et al.*,  
329 2003, Griffith *et al.*, 2004, Wybenga-Groot *et al.*, 2001). In RqkA also, tyrosine 287 (Y287)  
330 and threonine 281 and 294 (T281 and T294) are in the JLR region (281-305 amino acid),  
331 which raises the possibility of autophosphorylation mediated conformational change of JLR  
332 region and a possibility of attenuation of RqkA function.

333 STPKs are believed to be promiscuous and can phosphorylate proteins non-specifically *in*  
334 *vitro*. However, if this is true *in vivo*, then overexpression of STPKs should be lethal to be  
335 survival of the host, which has not been observed in most of the cases studied so far. Here,  
336 we observed that when *E. coli* expressing only RqkA, many host proteins are phosphorylated,  
337 which reduced drastically in the presence of its cognate substrate from *D. radiodurans* (Fig.  
338 4). This could be explained on the assumption that RqkA in the presence of its substrate  
339 becomes more specific and that would be possible only when specific substrates interact with  
340 enzyme through unique contact regions in the kinase, thus the WD40 domain of RqkA may  
341 provide such specific interaction sites. The WD40 domain in RqkA showed several structural  
342 features of typical  $\beta$ -propeller proteins. RqkA appears to be related to both BamB and PQQ-  
343 dependent dehydrogenases (PQQ-DHs), sharing features such as the eight bladed  $\beta$ -propeller  
344 fold and the presence of repeating “tryptophan-docking motifs” (Fig. 1C).  $\beta$ -propeller blades  
345 of the WD40 domain in RqkA are joined together with DA loops providing a major  
346 molecular surface on the top surface (Fig.2B). The surface of the blades of WD proteins has  
347 been shown to take part in protein-protein interactions (Wu *et al.*, 2012). Interestingly, DA  
348 loop connecting strand D5 to A6 (DA<sup>56</sup>) is longer than other loops and protrudes out toward  
349 the top surface which may provide an additional surface for some specific interactions (Fig.  
350 S2) “(for reviewers information only)”. PQQ has been shown to physically interact with  
351 RqkA kinase (Rajpurohit *et al.*, 2010) and binding of PQQ with the WD40 domain of many  
352 dehydrogenases help them to attain holoenzyme activity (Anthony *et al.*, 1994, Schrover *et*  
353 *al.*, 1993). Our results of PQQ mediated stimulation of wild type RqkA but not of WD40  
354 mutants of RqkA argue in favor of WD40 domain and may provide large surface for the  
355 specific interaction and help in enhance its kinase activity (Fig.5). Thus, the possibility of  
356 WD40 domain role in determining the substrate specificity of RqkA in its kinase function is  
357 suggested.

358 The ionizing radiation damages biological macromolecules indirectly through the radiolysis  
359 of water producing reactive oxygen and nitrogen species, and directly by the deposition of  
360 ionizing energy on covalent bonds and their breakage. The metabolic cross-talk between both

361 these effects has been studied by measuring macromolecular damages as a function of  
362 antioxidant metabolites (AOM), antioxidant unique peptides, and antioxidant enzymes (AOE)  
363 (Smith *et al.*, 2017, Reisz *et al.*, 2014). The role of AOM in direct regulation of  
364 macromolecular events associated with DNA damage response and repair have not been  
365 studied elaborately. This study has brought forth some experimental evidence to delineate  
366 molecular links between oxidative stress and DNA damage response and repair, albeit in a  
367 restricted bacterial model system *Deinococcus radiodurans*. Earlier, PQQ has been shown to  
368 react with artificially produced reactive oxygen species and function as antioxidant and  
369 radioprotector (Misra *et al.*, 2004, Misra *et al.*, 2012). Pyrroloquinoline quinone (PQQ)  
370 identified in this bacterium and having a role in oxidative stress tolerance as well as act as an  
371 inducer to gamma radiation responsive Ser/Thr kinase (RqkA) and regulates extraordinary  
372 radioresistance and DSB repair in this bacterium (Rajpurohit *et al.*, 2008, Rajpurohit and  
373 Misra, 2010). The  $\beta$  propeller motif has been shown to involve in interaction with PQQ in  
374 dehydrogenases that require it as a coenzyme for their activity (Anthony *et al.*, 1994,  
375 Schrover *et al.*, 1993). Ligand binding analyses using the Raptor-X server also suggested the  
376 top surface as a potential binding site for PQQ. When the gamma radiation and DNA damage  
377 responsiveness of the WD40 mutant of RqkA was measured as a function of  
378 autophosphorylation of RqkA and its WD40 mutant, WD40 mutant failed to respond both  
379 gamma radiation and DNA damage (Fig.3, C, E). Similarly, RqkA autophosphorylation was  
380 not stimulated in the  $\Delta pqqE$  mutant (devoid of PQQ) in *D. radiodurans* (Fig.3, A,  $\Delta pqqE$ ).  
381 The loss of  $\gamma$  radiation mediated activation of RqkA in the  $\Delta pqqE$  mutant and absence of  $\gamma$   
382 radiation response of RqkA<sup>KD</sup> autophosphorylation suggest the importance of both WD40  
383 domain and PQQ in the activation of RqkA function in response to  $\gamma$  radiation and DNA  
384 damage-induced signaling through RqkA. PQQ has recently been shown to physically  
385 interact with cellular proteins in the mammalian system and crucial for the regulation of their  
386 enzymatic activity (Akagawa *et al.*, 2016). RqkA phosphorylates DNA repair and cell  
387 division proteins in response to gamma radiation and DNA damage (Rajpurohit and Misra,  
388 2013a, Rajpurohit *et al.*, 2016, Maurya *et al.*, 2018). Recent study has shown the presence of  
389 the WD40 domain in more than 4000 prokaryotic proteins where the majority of these  
390 proteins are STPKs (Hu *et al.*, 2017). Here, our results emphasize the role of the WD40  
391 domain in activity regulation of STPK (RqkA) and the bacterial response to gamma radiation  
392 damage. Based on the finding of this study and our earlier studies we propose a model of  
393 RqkA kinases activation in response to  $\gamma$  radiation (Fig.6). It summarizes that  $\gamma$  radiation

394 causes the cellular DNA damage and reactive oxygen and nitrogen species (ROS and RNS)  
395 generation, which leads to the upregulation of PQQ synthesis in *D. radiodurans* cells. PQQ  
396 activates the DNA damage responsive RqkA kinase through its interaction with conserved the  
397 WD40 domain and this interaction activates RqkA autophosphorylation mediated activation  
398 and support of radiation survival (Fig.6, A). In the absence of WD40 domain; RqkA could  
399 not be activated by PQQ leading RqkA inability to support radiation survival (Fig.6, B).  
400 In conclusion, we report the functional characterization of the C-terminal WD40 domain of  
401 RqkA in the regulation of the signaling function of RqkA. We demonstrated that the WD40  
402 domain is the site for PQQ mediated activation of RqkA, which could provide a molecular  
403 link between oxidative stress response and DNA damage response mediated by PQQ and  
404 RqkA in *D. radiodurans* respectively. The inability of WD40 mutant to phosphorylate a  
405 representative substrate DrRecA of RqkA, as well as the lack of enhancement of DrRecA  
406 phosphorylation by RqkA in the absence of PQQ suggested the role of WD40 and PQQ in the  
407 regulation of RqkA. While independent studies would be required to completely delineate a  
408 direct link between WD40 domain and PQQ interaction, the stoichiometry of PQQ  
409 interaction with RqkA and its impact on *in vivo* signal transduction in response to DNA  
410 damage. The available results suggest the role of the WD40 domain and PQQ in the  
411 regulation of signaling activity of RqkA and to the best of our knowledge, this is the first  
412 report on the role of the WD40 domain in the regulation of the STPKs in the bacterial  
413 response to gamma radiation and DNA damage.

414

## 415 **Experimental procedures:**

### 416 **Bacterial strains, plasmids, and materials**

417 *D. radiodurans* R1 (ATCC13939) was grown in TGY (Bacto tryptone (1%), Glucose (0.1%)  
418 and Yeast extract (0.5%)) medium with shaking at 180 rpm at 32°C. *E. coli* strain  
419 NOVABLUE was used for cloning and maintenance of all the plasmids; *E. coli* strain BL21  
420 (DE3) pLysS was used for the expression of recombinant proteins. *E. coli* cells harboring  
421 pRADgro and pET28a(+) were maintained in the presence of required antibiotics. The  
422 pRADgro and their derivatives were maintained in the presence of ampicillin (100 µg/ml) in  
423 *E. coli* and chloramphenicol (8 µg/ml) in *D. radiodurans* as described previously (Misra *et al.*,  
424 2006). Standard protocols for all recombinant techniques were used as described in (Green  
425 and Sambrook, 2012). An antibody against phosphor serine/threonine epitope was procured  
426 commercially (Cell Signaling Technology, USA). Antibodies against RqkA of *D.*  
427 *radiodurans* were commercially produced in the rabbit (MERCK Millipore, India). Molecular



428 biology grade chemicals and enzymes were procured from Sigma Chemicals Company, USA,  
429 Roche Biochemicals, Mannheim, Germany, New England Biolabs, USA, and Merk India Pvt.  
430 Ltd. India.

### 431 **Homology Modelling and Analyses**

432 Homology modelling was performed by the Raptor-X server (Källberg *et al.*, 2012). RaptorX  
433 server used multiple templates to build N and C-terminal domains. The N-terminal kinase  
434 domain was modeled using templates like PknA of *Mycobacterium tuberculosis* (PDB Ids  
435 6B2Q, 4OW8 and 4X3F), PknB of *Mycobacterium tuberculosis* (PDB Id 3ORI) and  
436 *Staphylococcus aureus* (PDB Id 4EQM). Similarly, *Escherichia coli* BamB protein (PDB Ids  
437 3P1L, 4PK1), *Pseudomonas aeruginosa* BamB protein (PDB Id 4HDJ), *Moraxella*  
438 *catarrhalis* BamB protein (PDB Id 4IMM) and *Methylobacterium buryatense* methanol  
439 dehydrogenase (PDB Id 6DAM) were used to build C-terminal region. The model built by  
440 Raptor-X was then refined using the ReFold server (Shuid *et al.*, 2017). The geometry of the  
441 model was optimized automatically using Phenix and manually using WinCoot. The quality  
442 of the optimized model was then evaluated using ProSA, QMEAN and PROCHECK  
443 (Wiederstein & Sippl, 2007, Benkert *et al.*, 2011, Laskowski *et al.*, 1993). Ligand binding  
444 sites in the model were also identified using Raptor-X server. Conserved residues in the rqaA  
445 were analyzed using the ConSurf server (Ashkenazy *et al.*, 2016). The surface electrostatic  
446 potentials of the structure were generated using APBS software with default settings as  
447 implemented in PyMol. For the assessment of the quality of the model, several validation  
448 software's were used. The Raptor-X server uses many parameters to judge the quality of the  
449 model. The P-value, uGDT and GDT scores for the alignment of query with the top ranked  
450 template are used together to assess the quality of the resulting model structure. The P-value,  
451 uGDT and GDT for RqaA model were  $5.57 \times 10^{-15}$ , 391 and 58 respectively. A good P-value is  
452  $< 10^{-3}$  for mainly alpha proteins and  $< 10^{-4}$  for mainly beta proteins. For a protein with  $> 100$   
453 residues,  $uGDT > 50$  is a good indicator. For a protein with  $< 100$  residues,  $GDT > 50$  is a good  
454 indicator. GDT is calculated as uGDT divided by the protein (or domain) length and  
455 multiplied by a 100. uGDT (GDT) measures the absolute model quality while P-value  
456 evaluates the relative quality of a model. The resulting model has good values of all three  
457 parameters suggesting the good quality of the model. The model was also analyzed for  
458 correct stereochemistry using PROCHECK. Ramachandran plot analysis using PROCHECK  
459 shows that 99.4% of the amino acid residues are in the allowed region and 0.6% are in the  
460 generously allowed region. No residue is found to be in the disallowed region. Pro-SA  
461 analysis of the model showed a Z-score of -9.74 which is in the range usually found for



462 experimental protein structures of similar sizes. Analysis using the Verify-3d server also  
463 showed good model quality with 95.36% of the residues having averaged 3D-1D score  $\geq$   
464 0.2.

#### 465 **Construction of WD40 mutants**

466 The Genomic DNA of *Deinococcus* was prepared as published previously (Battista *et al.*  
467 2001). For the cloning of *rqka*<sup>Wt</sup>, *rqka*<sup>KD</sup> and *rqka*<sup>KDJ</sup> genes in pRADgro plasmid (Rajpurohit  
468 and Misra, 2013b), DNA fragments were PCR amplified from the genomic DNA of DEIRA  
469 using primers listed in Table 1. PCR product was ligated at *ApaI* and *XbaI* sites in pRADgro  
470 to yield pGrorqka, pGrorqka<sup>KD</sup>, and pGrorqka<sup>KDJ</sup>. Plasmid DNA was prepared from these  
471 clones and the presence of insert in these plasmid samples was confirmed by restriction  
472 analysis and by sequencing. The recombinant plasmid was transformed into *D. radiodurans*  
473 and chloramphenicol resistant clones were isolated on TGY agar plates containing  
474 chloramphenicol (5 $\mu$ g/ml). pGrorqka<sup>Wt</sup>, pGrorqka<sup>KD</sup>, and pGrorqka<sup>KDJ</sup> plasmids were also  
475 transformed to *E. coli* cells expressing pETrecA (Rajpurohit *et al.*, 2016) for  
476 transphosphorylation studies in surrogate *E. coli* cells. These cells were grown in LB medium  
477 supplemented with Ampicillin (100 $\mu$ g/ml) and Kanamycin (25  $\mu$ g/ml).

#### 478 ***In vivo* phosphorylation studies in *D. radiodurans***

479 Phosphorylation studies were carried out in *D. radiodurans* as described earlier (Rajpurohit  
480 and Misra, 2010). For that, the  $\Delta$ *rqkA* and  $\Delta$ *rqkA\Delta**pqqE* mutants of *D. radiodurans*  
481 expressing wild type RqkA or its WD40 mutants (RqkA<sup>KD</sup> or RqkA<sup>KDJ</sup>) on plasmid were  
482 irradiated with 6 kGy radiation and allowed to recover in TGY medium as described earlier  
483 (Mishra *et al.*, 2019). Different aliquots were collected during post-irradiation recovery (PIR)  
484 and its corresponding SHAM controls, washed with 70% ethanol and snap-frozen in liquid  
485 nitrogen before storing at -70  $^{\circ}$ C overnight. For measuring the levels of autophosphorylation  
486 in RqkA and its WD40 mutants like RqkA<sup>KD</sup> or RqkA<sup>KDJ</sup>, the cell-free extracts were made  
487 and immunoprecipitated using polyclonal RqkA antibodies followed by immunoblotting  
488 using phospho-Ser / Thr antibodies (catalog no. 9631S, Cell Signaling Technology, USA) as  
489 described earlier (Maurya *et al.*, 2016). In brief, the cells were treated with lysozyme (10  
490 mg/ml) for 1 h at 37 $^{\circ}$ C, followed by 0.5% NP-40 in cell lysis buffer (20 mM Tris-HCl [pH  
491 8.0], 50 mM NaCl, 1 mM PMSF, 1 mM DTT). Treated cells were disrupted by either by  
492 sonication on an ice bath for 1 min and cleared supernatant was obtained by centrifuging at  
493 12000g for 30 min. Approximately, 500 $\mu$ g total proteins in cell-free extract incubated with  
494 RqkA antibodies raised in rabbit in binding buffer (140mM NaCl, 8 mM sodium phosphate,

495 2mM potassium phosphate, and 10mM KCL, pH 7.4). The mixture was incubated overnight  
496 at 4°C and to this; the Protein G agarose beads were added. The content was passed through  
497 the Econopack column (Biorad, USA) and washed thrice with binding buffer and eluted with  
498 500mM NaCl in binding buffer. The eluent was precipitated with 2.5 volume of ice-chilled  
499 acetone and precipitate was dissolved in 2X Laemmli buffer for SDS-polyacrylamide gel  
500 electrophoresis. Proteins were separated and on 10% SDS-PAGE gel and blotted onto PVDF  
501 membrane and probed with polyclonal phospho-Ser/Thr antibodies (Cell Signaling  
502 Technology, USA). Signals were detected using anti-rabbit IgG conjugated with alkaline  
503 phosphatase and the color reaction substrates NBT-BCIP (Roche Biochemicals, Germany).

#### 504 **Phosphorylation studies in surrogate *E. coli***

505 The phosphorylation of DrRecA by RqkA or its WD40 mutants (RqkA<sup>KD</sup> or RqkA<sup>KDJ</sup>) was  
506 checked using *E. coli* surrogate host co-expressing these proteins from plasmids as described  
507 earlier (Maurya *et al.*, 2018). For that, *E. coli* BL21 (DE3) pLysS cells were co-transformed  
508 pRADrqaA, pRADrqaA<sup>KD</sup> and pRADrqaA<sup>KDJ</sup> with pETrecA, separately. The recombinant  
509 proteins were induced with IPTG and an equal number of cells expressing wild type RqkA or  
510 RqkA<sup>KD</sup> and RqkA<sup>KDJ</sup> with DrRecA were lysed in 2X Laemmli buffer. The clear supernatant  
511 was separated on SDS-PAGE and transferred to PVDF membrane and probed with  
512 polyclonal phosphor-Ser/Thr epitope antibodies (Cell Signaling Technology, USA) as  
513 described earlier (Rajpurohit *et al.*, 2016). To see the PQQ effect on transphosphorylation  
514 activity of RqkA, the cells were grown in the presence of 1µM PQQ and compared with cells  
515 grown without PQQ for DrRecA phosphorylation as discussed above.

516

517 **Acknowledgements:** Acknowledge the Department of Atomic Energy (DAE), Government  
518 of India for financial and structural support.

519

520 **Author contribution:** D.K.S. planning and conducting experiments, results analysis,  
521 discussion. S.C.B. did all computational and modeling work. H.S.M. results analysis and  
522 discussion, paper writing and co-correspondence. Y.S.R. conceived the study, planning and  
523 execution of experiments, results analysis, discussion, paper writing, communication and  
524 correspondence for publication.

525

526

527

528

529

530 **References:**

531

- 532 1. Albrecht R, Zeth K. 2011. Structural basis of outer membrane protein biogenesis in  
533 bacteria. *J Biol Chem* 286:27792-803.
- 534 2. Akagawa M, Minematsu K, Shibata T, Kondo T, Ishii T, Uchida K. 2016.  
535 Identification of lactate dehydrogenase as a mammalian pyrroloquinoline quinone  
536 (PQQ)-binding protein. *Sci Rep* 6:26723.
- 537 3. Anthony C, Ghosh M.1998. The structure and function of the PQQ-containing  
538 quinoprotein dehydrogenases. *Prog Biophys Mol Biol* 69:1-21.
- 539 4. Anthony C, Ghosh M, Blake CC.1994. The structure and function of methanol  
540 dehydrogenase and related quinoproteins containing pyrrolo-quinoline quinone.  
541 *Biochem J* 304 ( Pt 3):665-74.
- 542 5. Ashkenazy H, Abadi S, Martz E, Chay O, Mayrose I, Pupko T, Ben-Tal N. 2016.  
543 ConSurf 2016: an improved methodology to estimate and visualize evolutionary  
544 conservation in macromolecules. *Nuc Aci Res* W344–W350.
- 545 6. Barthe P, Mukamolova GV, Roumestand C, Cohen-Gonsaud M. 2010. The structure  
546 of PknB extracellular PASTA domain from mycobacterium tuberculosis suggests a  
547 ligand-dependent kinase activation. *Structure* 18:606-15.
- 548 7. Benkert P, Biasini M, Schwede T. 2011. Toward the estimation of the absolute quality  
549 of individual protein structure models. *Bioinformatics* 27: 343-350.
- 550 8. Bihani SC, Panicker L, Rajpurohit YS, Misra HS, Kumar V. 2018. drFrnE Represents  
551 a Hitherto Unknown Class of Eubacterial Cytoplasmic Disulfide Oxido-Reductases.  
552 *Antioxid Redox Signal* 28(4):296-310.
- 553 9. Blasius M, Sommer S, Hubscher U.2008. *Deinococcus radiodurans*: what belongs to  
554 the survival kit? *Crit Rev Biochem Mol Biol* 43:221-38.
- 555 10. Bolsunovsky A, Frolova T, Dementyev D, Sinitsyna O.2016. Low doses of gamma-  
556 radiation induce SOS response and increase mutation frequency in *Escherichia coli*  
557 and *Salmonella typhimurium* cells. *Ecotoxicol Environ Saf* 134P1:233-238.
- 558 11. Bonacossa de Almeida C, Coste G, Sommer S, Bailone A.2002. Quantification of  
559 RecA protein in *Deinococcus radiodurans* reveals involvement of RecA, but not  
560 LexA, in its regulation. *Mol Genet Genomics* 268:28-41.
- 561 12. Bourret RB, Silversmith RE.2010. Two-component signal transduction. *Curr Opin*  
562 *Microbiol* 13:113-5.Chan, P.M., Ilangumaran, S., La Rose, J., Chakrabarty, A., and  
563 Rottapel, R. (2003) Autoinhibition of the kit receptor tyrosine kinase by the cytosolic  
564 juxtamembrane region. *Mol Cell Biol* 23: 3067-3078.
- 565 13. Cox MM, Battista JR.2005. *Deinococcus radiodurans* - the consummate survivor. *Nat*  
566 *Rev Microbiol* 3:882-92.
- 567 14. Daly MJ, Gaidamakova EK, Matrosova VY, Kiang JG, Fukumoto R, Lee DY, Wehr  
568 NB, Viteri GA, Berlett BS, Levine RL.2010. Small-molecule antioxidant proteome-  
569 shields in *Deinococcus radiodurans*. *PLoS One* 5:e12570.
- 570 15. Daly MJ, Minton KW.1996. An alternative pathway of recombination of  
571 chromosomal fragments precedes recA-dependent recombination in the radioresistant  
572 bacterium *Deinococcus radiodurans*. *J Bacteriol* 178:4461-71.
- 573 16. Desai, S.S., Rajpurohit, Y.S., Misra, H.S., and Deobagkar, D.N. (2011)  
574 Characterization of the role of the RadS/RadR two-component system in the radiation  
575 resistance of *Deinococcus radiodurans*. *Microbiology* 157: 2974-2982.

- 576 17. Didier JP, Cozzone AJ, Duclos B.2010. Phosphorylation of the virulence regulator  
577 SarA modulates its ability to bind DNA in *Staphylococcus aureus*. *FEMS Microbiol*  
578 *Lett* 306:30-6.
- 579 18. Dutta R, Qin L, Inouye M.1999. Histidine kinases: diversity of domain organization.  
580 *Mol Microbiol* 34:633-40.
- 581 19. Earl AM, Mohundro MM, Mian IS, Battista JR.2002. The IrrE protein of  
582 *Deinococcus radiodurans* R1 is a novel regulator of *recA* expression. *J Bacteriol*  
583 184:6216-24.
- 584 20. Fernandez P, Saint-Joanis B, Barilone N, Jackson M, Gicquel B, Cole ST, Alzari  
585 PM.2006. The Ser/Thr protein kinase PknB is essential for sustaining mycobacterial  
586 growth. *J Bacteriol* 188:7778-84.
- 587 21. Gao R, Stock AM.2009. Biological insights from structures of two-component  
588 proteins. *Annu Rev Microbiol* 63:133-54.
- 589 22. Garcia-Garcia T, Poncet S, Derouiche A, Shi L, Mijakovic I, Noirot-Gros MF.2016.  
590 Role of Protein Phosphorylation in the Regulation of Cell Cycle and DNA-Related  
591 Processes in Bacteria. *Front Microbiol* 7:184.
- 592 23. Good MC, Greenstein AE, Young TA, Ng HL, Alber T.2004. Sensor domain of the  
593 *Mycobacterium tuberculosis* receptor Ser/Thr protein kinase, PknD, forms a highly  
594 symmetric beta propeller. *J Mol Biol* 339:459-69.
- 595 24. Griffith J, Black J, Faerman C, Swenson L, Wynn M, Lu F, Lippke J, Saxena K.2004.  
596 The structural basis for autoinhibition of FLT3 by the juxtamembrane domain. *Mol*  
597 *Cell* 13:169-78.
- 598 25. Hanks SK, Hunter T.1995. Protein kinases 6. The eukaryotic protein kinase  
599 superfamily: kinase (catalytic) domain structure and classification. *FASEB J* 9:576-  
600 96.
- 601 26. Hanks SK, Quinn AM, Hunter T.1988. The protein kinase family: conserved features  
602 and deduced phylogeny of the catalytic domains. *Science* 241:42-52.
- 603 27. Hu XJ, Li T, Wang Y, Xiong Y, Wu XH, Zhang DL, Ye ZQ, Wu YD.2017.  
604 Prokaryotic and Highly-Repetitive WD40 Proteins: A Systematic Study. *Sci Rep*  
605 7:10585.
- 606 28. Hua Y, Narumi I, Gao G, Tian B, Satoh K, Kitayama S, Shen B.2003. PprI: a general  
607 switch responsible for extreme radioresistance of *Deinococcus radiodurans*. *Biochem*  
608 *Biophys Res Commun* 306:354-60.
- 609 29. Huse M, Kuriyan J.2002. The conformational plasticity of protein kinases. *Cell*  
610 109:275-82.
- 611 30. Joshi B, Schmid R, Altendorf K, Apte SK.2004. Protein recycling is a major  
612 component of post-irradiation recovery in *Deinococcus radiodurans* strain R1.  
613 *Biochem Biophys Res Commun* 320:1112-7.
- 614 31. Källberg M, Wang H, Wang S, Peng J, Wang Z, Lu H, Xu J. 2012. Template-based  
615 protein structure modeling using the RaptorX web server. *Nat Protocol* 7, 1511–1522.
- 616 32. Kennelly PJ.2002. Protein kinases and protein phosphatases in prokaryotes: a  
617 genomic perspective. *FEMS Microbiol Lett* 206:1-8.
- 618 33. Khairnar NP, Misra HS, Apte SK.2003. Pyrroloquinoline-quinone synthesized in  
619 *Escherichia coli* by pyrroloquinoline-quinone synthase of *Deinococcus radiodurans*  
620 plays a role beyond mineral phosphate solubilization. *Biochem Biophys Res Commun*  
621 312:303-8.
- 622 34. Kim JI, Cox MM.2002. The RecA proteins of *Deinococcus radiodurans* and  
623 *Escherichia coli* promote DNA strand exchange via inverse pathways. *Proc Natl Acad*  
624 *Sci U S A* 99:7917-21.

- 625 35. Kobir A, Shi L, Boskovic A, Grangeasse C, Franjevic D, Mijakovic I.2011. Protein  
626 phosphorylation in bacterial signal transduction. *Biochim Biophys Acta* 1810:989-94.
- 627 36. Krupa A, Srinivasan N.2005. Diversity in domain architectures of Ser/Thr kinases and  
628 their homologues in prokaryotes. *BMC Genomics* 6:129.
- 629 37. Laskowski RA, MacArthur MW, Moss DS, Thornton, J. M. (1993) PROCHECK - a  
630 program to check the stereochemical quality of protein structures. *J App Cry* 26: 283-  
631 291.
- 632 38. Leonard, C.J., Aravind, L., and Koonin, E.V. 1998. Novel families of putative protein  
633 kinases in bacteria and archaea: evolution of the "eukaryotic" protein kinase  
634 superfamily. *Genome Res* 8: 1038-1047.
- 635 39. Liu Y, Zhou J, Omelchenko MV, Beliaev AS, Venkateswaran A, Stair J, Wu L,  
636 Thompson DK, Xu D, Rogozin IB, Gaidamakova EK, Zhai M, Makarova KS, Koonin  
637 EV, Daly MJ.2003. Transcriptome dynamics of *Deinococcus radiodurans* recovering  
638 from ionizing radiation. *Proc Natl Acad Sci U S A* 100:4191-6.
- 639 40. Macek B, Mijakovic I, Olsen JV, Gnad F, Kumar C, Jensen PR, Mann M.2007. The  
640 serine/threonine/tyrosine phosphoproteome of the model bacterium *Bacillus subtilis*.  
641 *Mol Cell Proteomics* 6:697-707.
- 642 41. Maurya GK, Modi K, Misra HS. 2016. Divisome and segrosome components of  
643 *Deinococcus radiodurans* interact through cell division regulatory proteins. *Microbiol*  
644 162(8):1321-1334.
- 645 42. Maurya GK, Modi K, Banerjee M, Chaudhary R, Rajpurohit YS, Misra HS.2018.  
646 Phosphorylation of FtsZ and FtsA by a DNA Damage-Responsive Ser/Thr Protein  
647 Kinase Affects Their Functional Interactions in *Deinococcus radiodurans*. *mSphere* 3.
- 648 43. Minton KW.1994. DNA repair in the extremely radioresistant bacterium *Deinococcus*  
649 *radiodurans*. *Mol Microbiol* 13:9-15.
- 650 44. Misra HS, Khairnar NP, Barik A, Indira Priyadarsini K, Mohan H, Apte SK.2004.  
651 Pyrroloquinoline-quinone: a reactive oxygen species scavenger in bacteria. *FEBS Lett*  
652 578:26-30.
- 653 45. Misra HS, Rajpurohit YS, Khairnar NP. 2012. Pyrroloquinoline-quinone and its  
654 versatile roles in biological processes. *J Basic Microbiol* 53(6):518-31.
- 655 46. Misra H.S., Rajpurohit, Y.S., and Kota, S. (2013) Physiological and molecular basis  
656 of extreme radioresistance in *Deinococcus radiodurans* *Current Sci* 104:194-205.
- 657 47. Misra HS, Maurya GK, Chaudhary R, Misra CS. 2018. Interdependence of bacterial  
658 cell division and genome segregation and its potential in drug development. *Microbiol*  
659 *Res* 208:12-24.
- 660 48. Mishra S, Chaudhary R, Singh S, Kota S, Misra HS. 2019. Guanine Quadruplex  
661 DNA Regulates Gamma Radiation Response of Genome Functions in the  
662 Radioresistant Bacterium *Deinococcus radiodurans*. *J Bacteriol* 8: 201(17).
- 663 49. Molle V, Kremer L.2010. Division and cell envelope regulation by Ser/Thr  
664 phosphorylation: Mycobacterium shows the way. *Mol Microbiol* 75:1064-77.
- 665 50. Mylona A, Fernandez-Tornero C, Legrand P, Haupt M, Sentenac A, Acker J, Muller  
666 CW.2006. Structure of the tau60/Delta tau91 subcomplex of yeast transcription factor  
667 IIIC: insights into preinitiation complex assembly. *Mol Cell* 24:221-32.
- 668 51. Narumi I, Satoh K, Kikuchi M, Funayama T, Yanagisawa T, Kobayashi Y, Watanabe  
669 H, Yamamoto K.2001. The LexA protein from *Deinococcus radiodurans* is not  
670 involved in RecA induction following gamma irradiation. *J Bacteriol* 183:6951-6.
- 671 52. Oshima T, Aiba H, Masuda Y, Kanaya S, Sugiura M, Wanner BL, Mori H, Mizuno  
672 T.2002. Transcriptome analysis of all two-component regulatory system mutants of  
673 *Escherichia coli* K-12. *Mol Microbiol* 46:281-91.
- 674 53. Parkinson JS.1993. Signal transduction schemes of bacteria. *Cell* 73:857-71.



- 675 54. Pereira SF, Goss L, Dworkin J.2011. Eukaryote-like serine/threonine kinases and  
676 phosphatases in bacteria. *Microbiol Mol Biol Rev* 75:192-212.
- 677 55. Rajpurohit YS, Bihani SC, Waldor MK, Misra HS.2016. Phosphorylation of  
678 *Deinococcus radiodurans* RecA Regulates Its Activity and May Contribute to  
679 Radioresistance. *J Biol Chem* 291:16672-85.
- 680 56. Rajpurohit YS, Gopalakrishnan R, Misra HS.2008. Involvement of a protein kinase  
681 activity inducer in DNA double strand break repair and radioresistance of  
682 *Deinococcus radiodurans*. *J Bacteriol* 190:3948-54.
- 683 57. Rajpurohit YS, Misra HS.2010. Characterization of a DNA damage-inducible  
684 membrane protein kinase from *Deinococcus radiodurans* and its role in bacterial  
685 radioresistance and DNA strand break repair. *Mol Microbiol* 77:1470-82.
- 686 58. Rajpurohit YS, Misra HS.2013. Structure-function study of deinococcal  
687 serine/threonine protein kinase implicates its kinase activity and DNA repair protein  
688 phosphorylation roles in radioresistance of *Deinococcus radiodurans*. *Int J Biochem*  
689 *Cell Biol* 45:2541-52.
- 690 59. Rajpurohit YS, Misra HS. 2013b. DR1769, a protein with N-terminal beta propeller  
691 repeats and a low-complexity hydrophilic tail, plays a role in desiccation tolerance of  
692 *Deinococcus radiodurans*. *J Bacteriol* 195 (17):3888-3896.
- 693 60. Rajpurohit YS, Desai SS, Misra HS. 2013c. Pyrroloquinoline quinone and a  
694 quinoprotein kinase support  $\gamma$ -radiation resistance in *Deinococcus radiodurans* and  
695 regulate gene expression. *J Basic Microbiol* 53(6):518-31.
- 696 61. Reisz JA, Bansal N, Qian J, Zhao W, Furdui CM. 2014. Effects of ionizing radiation  
697 on biological molecules--mechanisms of damage and emerging methods of detection.  
698 *Anti Red Sig* 21(2):260-92.
- 699 62. Sancar A, Lindsey-Boltz LA, Unsal-Kacmaz K, Linn S.2004. Molecular mechanisms  
700 of mammalian DNA repair and the DNA damage checkpoints. *Annu Rev Biochem*  
701 73:39-85.
- 702 63. Sassetti CM, Boyd DH, Rubin EJ.2003. Genes required for mycobacterial growth  
703 defined by high density mutagenesis. *Mol Microbiol* 48:77-84.
- 704 64. Scherr N, Honnappa S, Kunz G, Mueller P, Jayachandran R, Winkler F, Pieters J,  
705 Steinmetz MO.2007. Structural basis for the specific inhibition of protein kinase G, a  
706 virulence factor of *Mycobacterium tuberculosis*. *Proc Natl Acad Sci U S A*  
707 104:12151-6.
- 708 65. Schrover JM, Frank J, van Wielink JE, Duine JA.1993. Quaternary structure of  
709 quinoprotein ethanol dehydrogenase from *Pseudomonas aeruginosa* and its  
710 reoxidation with a novel cytochrome c from this organism. *Biochem J* 290 ( Pt  
711 1):123-7.
- 712 66. Shah IM, Laaberki MH, Popham DL, Dworkin J.2008. A eukaryotic-like Ser/Thr  
713 kinase signals bacteria to exit dormancy in response to peptidoglycan fragments. *Cell*  
714 135:486-96.
- 715 67. Sharma DK, Siddiqui MQ, Gadewal N, Choudhary RK, Varma AK, Misra HS,  
716 Rajpurohit YS.2020. Phosphorylation of deinococcal RecA affects its structural and  
717 functional dynamics implicated for its roles in radioresistance of *Deinococcus*  
718 *radiodurans*. *J Biomol Struct Dyn* 38:114-123.
- 719 68. Shimoni Y, Altuvia S, Margalit H, Biham O.2009. Stochastic analysis of the SOS  
720 response in *Escherichia coli*. *PLoS One* 4:e5363.
- 721 69. Shuid AN, Kempster R, McGuffin LJ. 2017. ReFOLD: a server for the refinement of  
722 3D protein models guided by accurate quality estimates. *Nuc Aci Res* 3: 45.
- 723 70. Skaar JR, Pagan JK, Pagano M.2014. SCF ubiquitin ligase-targeted therapies. *Nat*  
724 *Rev Drug Discov* 13:889-903.



- 725 71. Slade D, Lindner AB, Paul G, Radman M.2009. Recombination and replication in  
726 DNA repair of heavily irradiated *Deinococcus radiodurans*. *Cell* 136:1044-55.
- 727 72. Smith TA, Kirkpatrick DR, Smith S, Smith TK, et al. 2017. Radioprotective agents to  
728 prevent cellular damage due to ionizing radiation. *J Trans Med* 15: 232.
- 729 73. Tanaka M, Earl AM, Howell HA, Park MJ, Eisen JA, Peterson SN, Battista JR.2004.  
730 Analysis of *Deinococcus radiodurans*'s transcriptional response to ionizing radiation  
731 and desiccation reveals novel proteins that contribute to extreme radioresistance.  
732 *Genetics* 168:21-33.
- 733 74. Wall MA, Coleman DE, Lee E, Iniguez-Lluhi JA, Posner BA, Gilman AG, Sprang  
734 SR.1995. The structure of the G protein heterotrimer Gi alpha 1 beta 1 gamma 2. *Cell*  
735 83:1047-58.
- 736 75. Wang L, Xu G, Chen H, Zhao Y, Xu N, Tian B, Hua Y. 2008. DrRRA: a novel  
737 response regulator essential for the extreme radioresistance of *Deinococcus*  
738 *radiodurans*. *Mol Microbiol* 67: 1211-1222.
- 739 76. Wiederstein M, Sippl MJ. 2007. ProSA-web: interactive web service for the  
740 recognition of errors in three-dimensional structures of proteins. *Nuc Aci Res* 35:  
741 W407-410.
- 742 77. Wu XH, Wang Y, Zhuo Z, Jiang F, Wu YD.2012. Identifying the hotspots on the top  
743 faces of WD40-repeat proteins from their primary sequences by beta-bulges and  
744 DHSW tetrads. *PLoS One* 7:e43005.
- 745 78. Wybenga-Groot LE, Baskin B, Ong SH, Tong J, Pawson T, Sicheri F.2001. Structural  
746 basis for autoinhibition of the Ephb2 receptor tyrosine kinase by the  
747 unphosphorylated juxtamembrane region. *Cell* 106:745-57.
- 748 79. Zahradka K, Slade D, Bailone A, Sommer S, Averbeck D, Petranovic M, Lindner AB,  
749 Radman M.2006. Reassembly of shattered chromosomes in *Deinococcus radiodurans*.  
750 *Nature* 443:569-73.
- 751 80. Zhang C, Zhang F.2015. The Multifunctions of WD40 Proteins in Genome Integrity  
752 and Cell Cycle Progression. *J Genomics* 3:40-50.
- 753 81. Zhou BB, Elledge SJ.2000. The DNA damage response: putting checkpoints in  
754 perspective. *Nature* 408:433-9.
- 755
- 756
- 757
- 758
- 759
- 760
- 761
- 762

763 **Table 1. List of primers used.**

| Sl. No | Name of primers        | Nucleotide sequences of primers       | Purpose                   |
|--------|------------------------|---------------------------------------|---------------------------|
| 1      | RqkA -F                | 5'TTAGGGCCCCTAGGCGGGGCCGTCGGGGT3'     | pRAD, rqkA                |
| 2      | RqkA-R                 | 5'TAT TCTAGACCA CCC TTC CTG CTC GCT3' | pRAD, rqkA                |
| 3      | RqkA <sup>KD</sup> -R  | 5' TTATCTAGACTAGTGCGCGAGCGCCGCCCC3'   | pRAD, rqkA <sup>KD</sup>  |
| 4      | RqkA <sup>KDJ</sup> -R | 5'TTATCTAGACTACACCTCGTCGCGCGCCGCG 3'  | pRAD, rqkA <sup>KDJ</sup> |

764

765

766 **Figure Legends:**

767

768 **Figure 1: Structural features of RqkA.** (A) 3-dimensional structure model of RqkA  
769 showing N-terminal kinase domain and C-terminal WD 40 domain connected with a linker.  
770 (B) Top views of RqkA WD-40 domain showing 8 bladed  $\beta$ -propeller with velcro closure.  
771 (C) Conserved tryptophan in 7 out of 8 blades forms stabilizing girdle.

772

773 **Figure 2: Functional complementation of RqkA loss in  $\Delta$ rqkA mutant of *D. radiodurans***  
774 **by wild type and WD40 domain mutants of RqkA.** Wild type RqkA and its mutants like  
775 RqkA<sup>KD</sup> and RqkA<sup>KDJ</sup> were expressed in  $\Delta$ rqkA mutant of *D. radiodurans* and the cell  
776 survival was monitored at different doses of  $\gamma$  radiation and compared with wild type (R1).  
777 Data given are representatives of the reproducible experiments repeated 3 times  
778 independently.

779 **Figure 3: *In vivo* autophosphorylation status of RqkA and its RqkA<sup>KD</sup> and RqkA<sup>KDJ</sup>**  
780 **mutants in *Deinococcus radiodurans*.** Cells were grown to exponential phase and irradiated  
781 to 6.0 kGy radiation. Gamma irradiated (I) and respective unirradiated (SHAM) control (UI)  
782 cells were grown in fresh media and aliquots were collected at different time points of post-  
783 irradiation recovery (PIR). The RqkA was immunoprecipitated from cell lysate of  $\Delta$ rqkA and  
784  $\Delta$ rqkA $\Delta$ pqqE mutants cells expressing either wild type RqkA or its C-terminal WD40 mutant  
785 (RqkA<sup>KD</sup> or RqkA<sup>KDJ</sup>) using antibodies against RqkA (Anti-RqkA). Immunoprecipitants  
786 from different samples was separated on SDS-PAGE and immunoblotted using antibodies to  
787 recognize phosphor serine/threonine epitope (Anti phospho-Ser/Thr Ab) as detailed in  
788 methods. (A) *In vivo* phosphorylation status of wild type RqkA during PIR, (C) *In vivo*  
789 phosphorylation status of wild type RqkA<sup>KD</sup> during PIR, (C) *In vivo* phosphorylation status of

790 wild type RqkA<sup>KDJ</sup> during PIR. (B), (D) and (F) showing the SDS PAGE profile of  
791 immunoprecipitated proteins using Anti-RqkA, used to probe the phosphorylation status by  
792 Anti phospho-Ser/Thr Ab of (A), (C) and (E) panel respectively. Data given are  
793 representatives of the reproducible experiments repeated 3 times.

794 **Figure 4: *In vivo* transphosphorylation activity of wild type RqkA and its RqkA<sup>KD</sup> and**  
795 **RqkA<sup>KDJ</sup> mutants in surrogate *E. coli* cells.** For transphosphorylation studies inside the  
796 surrogate *E. coli* cells, the *E. coli* BL21 cells harboring pRAD plasmid expressing RqkA or  
797 its C-terminal mutant lacking WD40 domain (RqkA<sup>KD</sup> or RqkA<sup>KDJ</sup>) were co-transformed  
798 with pET28a+ plasmids expressing DrRecA. pRAD vector alone used as vector control (V)  
799 while pRADrqa expressing RqkA taken as kinase control (K). *E. coli* harboring pRADrqa  
800 and pETdnaA plasmids expressing RqkA and DnaA were used as a positive control (Maurya  
801 et al., 2018). *E. coli* BL21 cells coexpressing kinase and its cognate substrate were grown to  
802 log phase and sampled (U), after that IPTG was added to induce the cognate substrate  
803 (DrRecA) from pET28a+ vector and sampled (I). Uninduced (U) and induced (I) cells along  
804 with vector control and kinase control cells were lysed and proteins from these cells were  
805 separated on SDS-PAGE and immunoblotted using phospho-Ser/Thr (Immunoblot (Anti p-  
806 Ser/Thr) epitopes antibodies as described in methods. Bands corresponding to  
807 phosphorylated; P-RecA, P-RqkA, P-RqkA<sup>KD</sup>, P-RqkA<sup>KDJ</sup> and positive control (P-DnaA) are  
808 marked in the immunoblots (upper panel) (A). Sizes of immunostained protein bands were  
809 estimated using molecular weight markers (M). Arrows indicate the identity and position of  
810 respective phosphoprotein bands. Data given are representatives of the reproducible  
811 experiments repeated 3 times.

812 **Figure 5: The effect of PQQ on *in vivo* transphosphorylation activity of RqkA and its**  
813 **RqkA<sup>KD</sup> and RqkA<sup>KDJ</sup> mutants in surrogate *E. coli* cells.** The transphosphorylation of  
814 DrRecA by wild type RqkA kinase or by its C-terminal mutant lacking WD40 domain  
815 (RqkA<sup>KD</sup> or RqkA<sup>KDJ</sup>) was checked in the cells supplemented with or without exogenous  
816 PQQ. *E. coli* BL21 cells coexpressing kinase and its cognate substrate (DrRecA) were grown  
817 to log phase and sampled (U) after that IPTG was added to induce the cognate substrate  
818 (DrRecA) from pET28a+ vector and sampled (I). A similar experiment was performed where  
819 cell growth supplemented with PQQ (1 $\mu$ M) and sampled uninduced (U) and induced (I) cells  
820 (PQQ). PQQ supplemented and no supplemented, Uninduced (U) and induced (I) cells were  
821 lysed and proteins from these cells were separated on SDS-PAGE and immunoblotted using  
822 phospho-Ser/Thr (Immunoblot (Anti p-Ser/Thr) epitopes antibodies as described in methods.  
823 Bands corresponding to phosphorylated; P-RecA and positive control (P-DnaA) are marked in

824 the immunoblots (upper panel) (A). Sizes of immunostained protein bands were estimated  
825 using molecular weight markers (M). Arrows indicate the identity and position of respective  
826 phosphoprotein bands. Data given are representatives of the reproducible experiments  
827 repeated 3 times.

828 **Figure 6: A model showing the activation of RqkA kinase.** A DNA damage responsive  
829 kinase activation depends on its interaction with PQQ through conserved WD40 domain. The  
830 level of PQQ strongly elevated after  $\gamma$  radiation / or under oxidative stress which leads to  
831 binding with the C-terminal WD40 domain of RqkA kinase and this interaction activates  
832 RqkA autophosphorylation mediated activation and support of radiation survival (Panel A).  
833 In the absence of WD40 domain, RqkA could not able to activate by PQQ leads to RqkA  
834 inability to support radiation survival (Panel B).

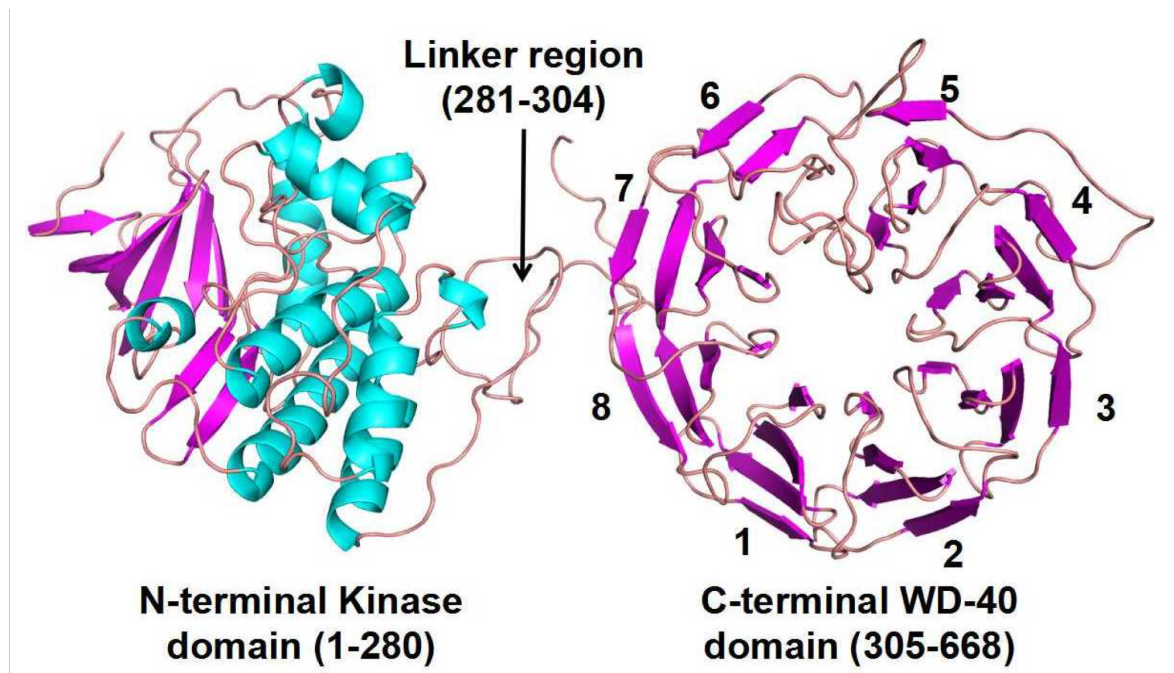

**A**

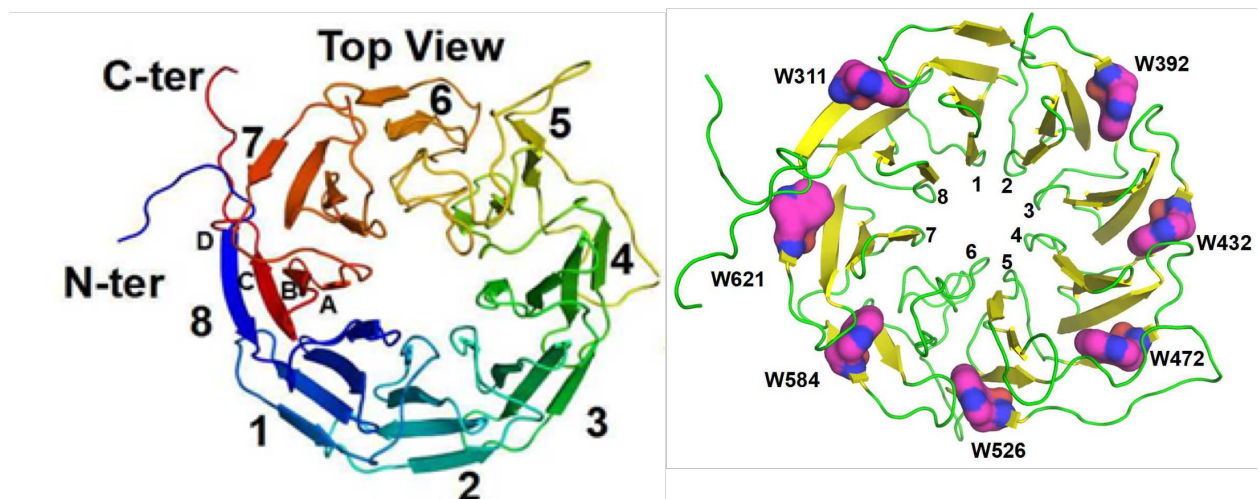

**B**

**C**

835

836

Figure.1

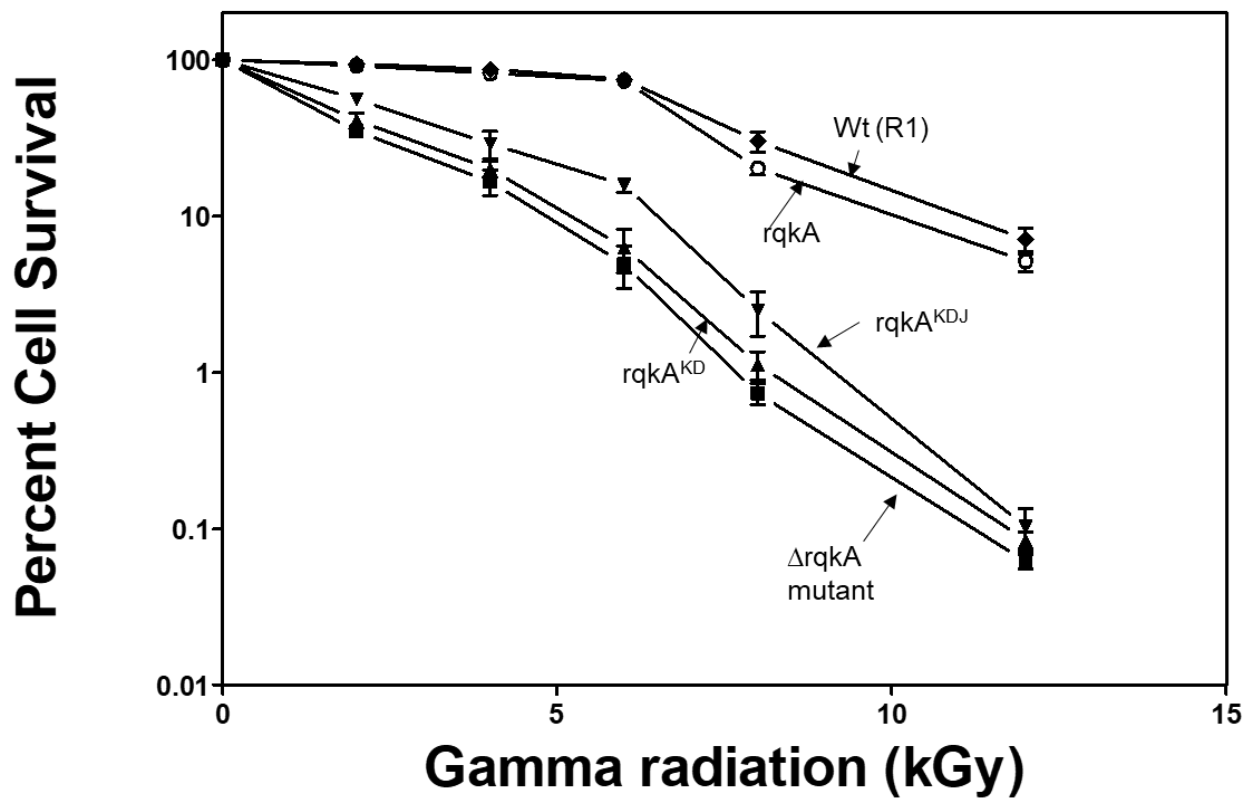

Figure. 2

837

838

839

840

841



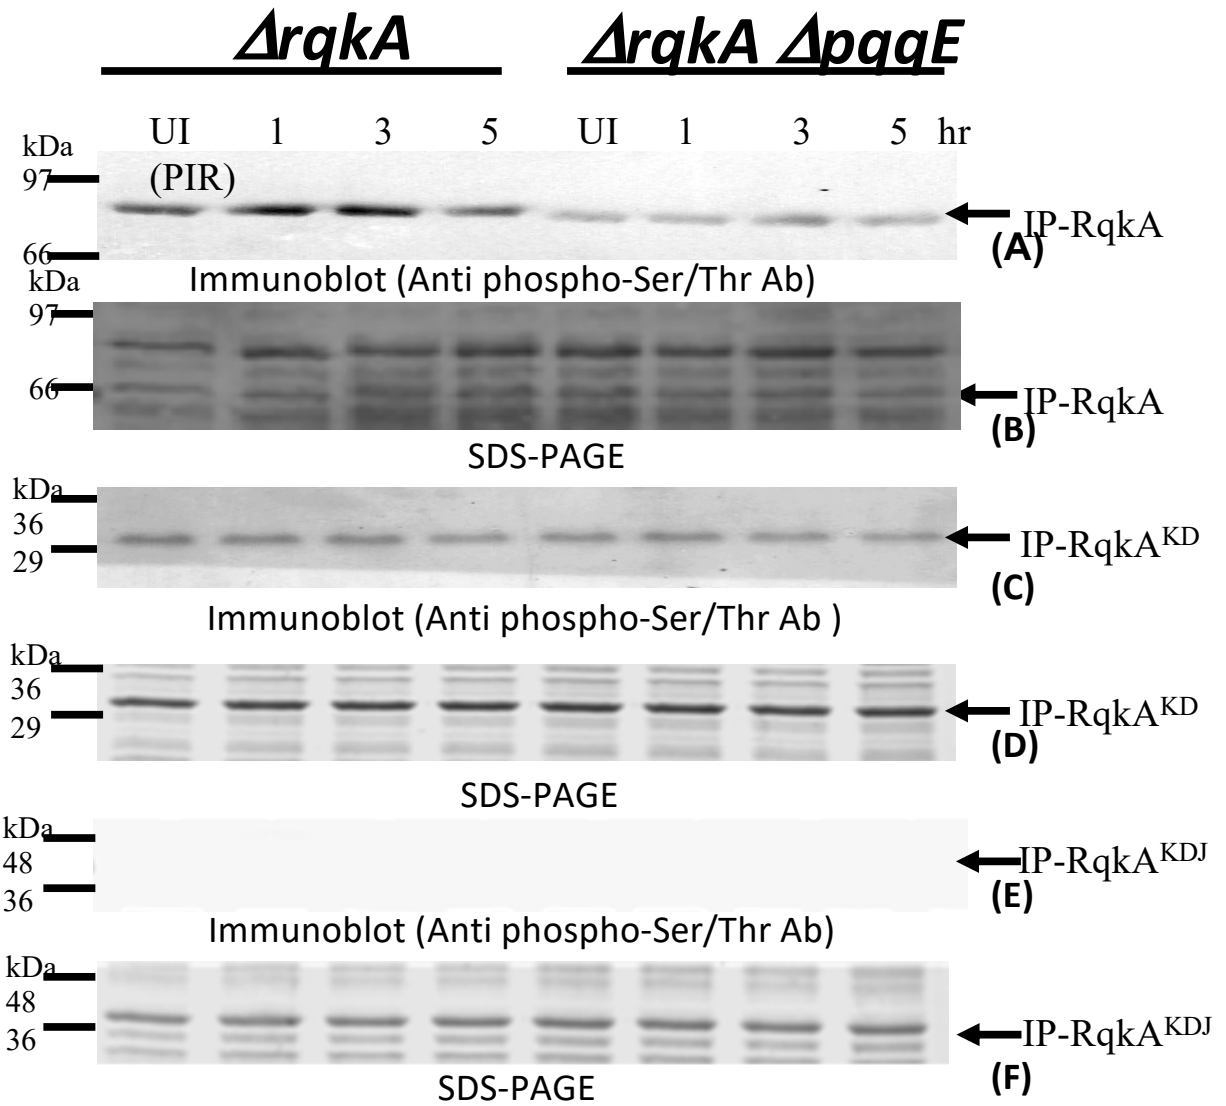

842

843

Figure. 3

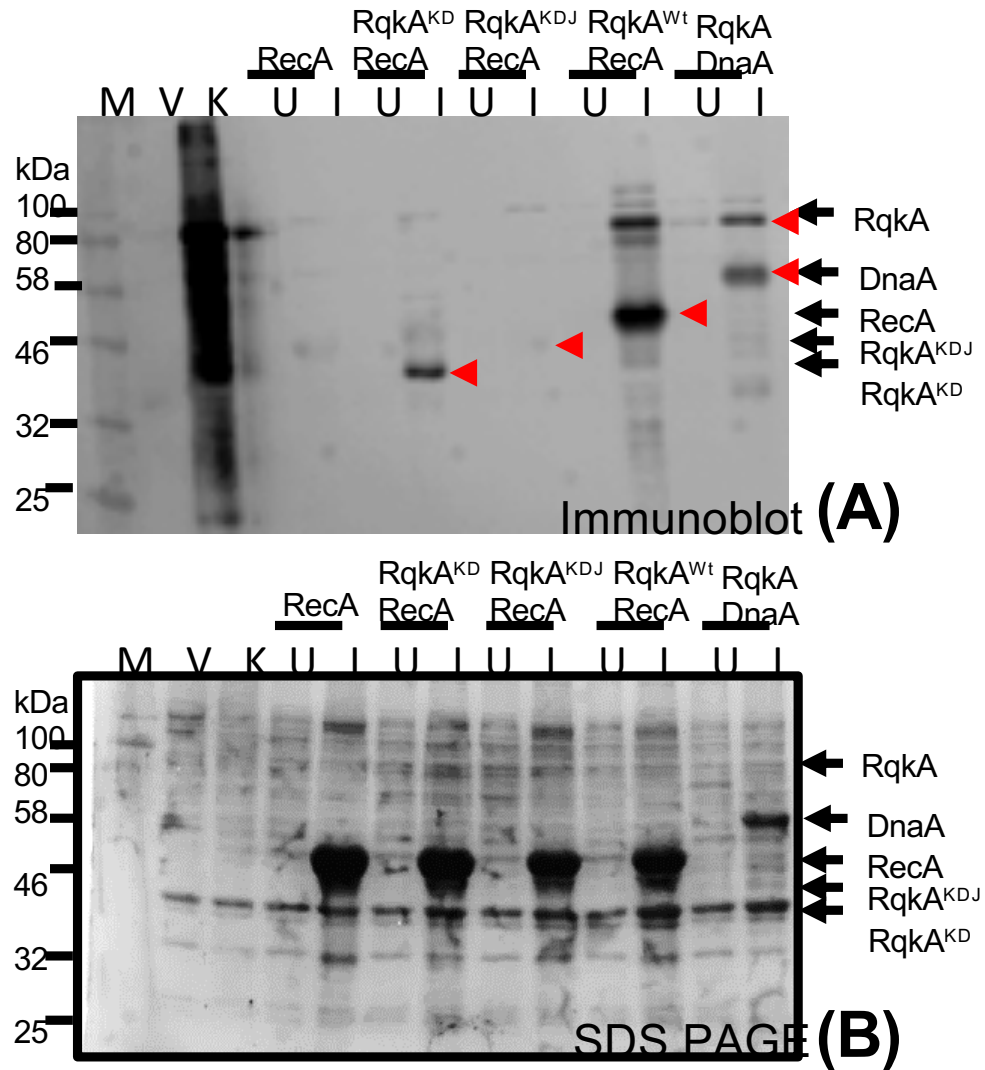

844

845

846

Figure. 4

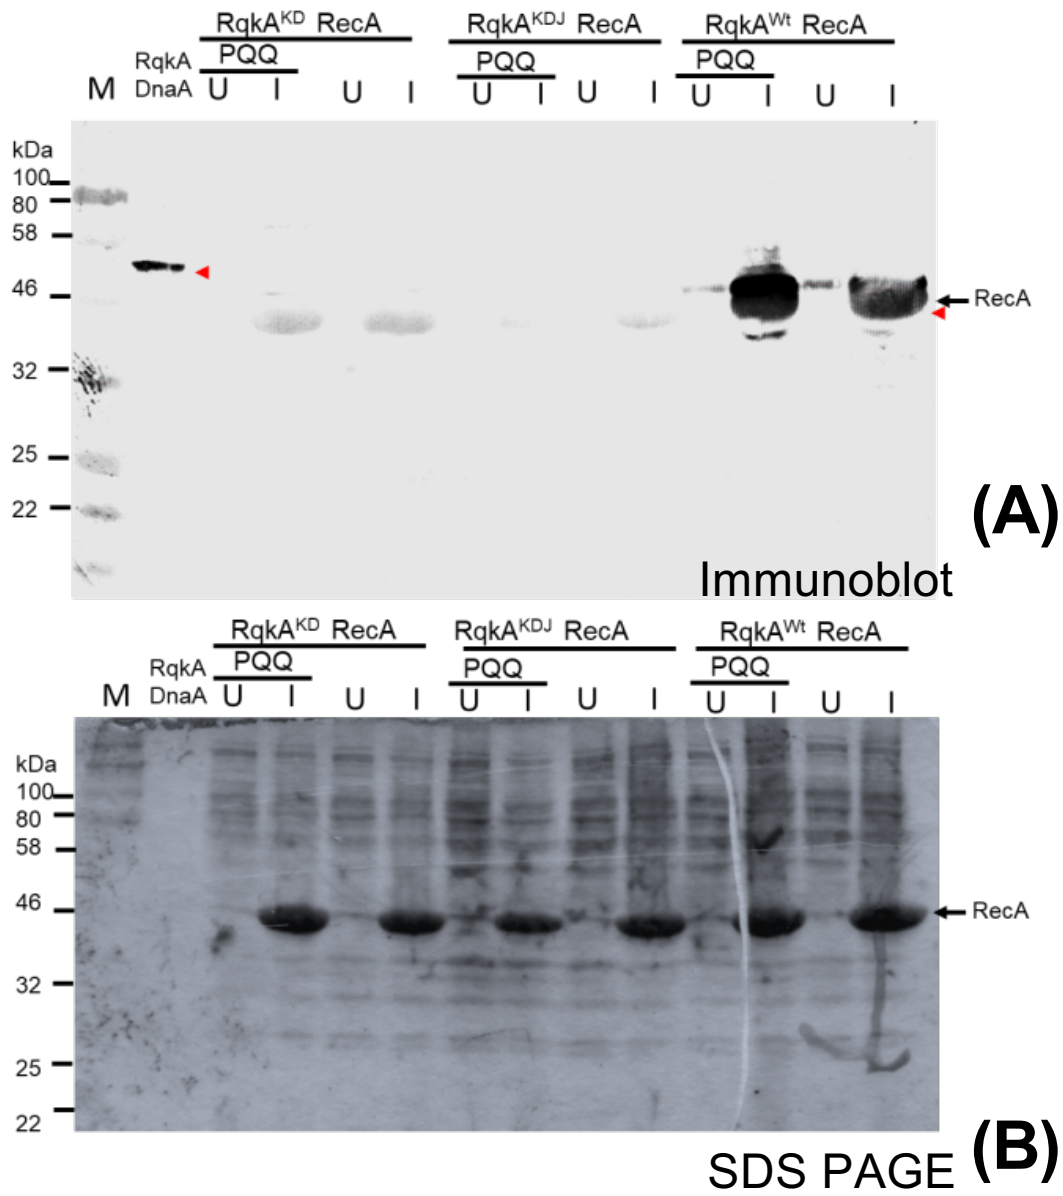

847

848

Figure. 5

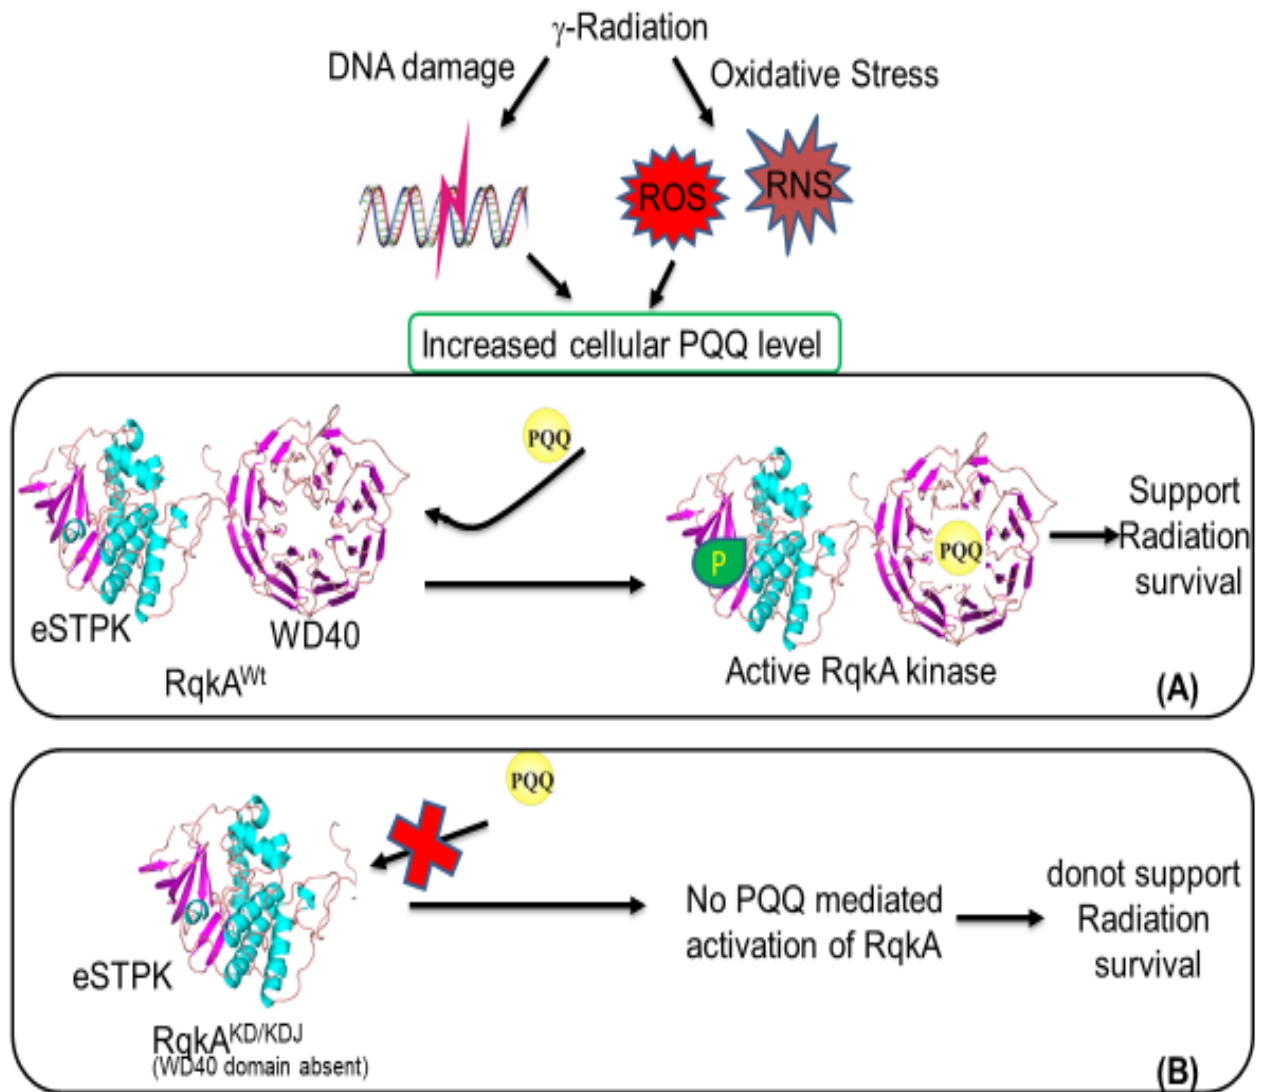

849  
850  
851  
852  
853  
854  
855  
856  
857  
858  
859  
860  
861  
862

Figure. 6

863 **Supplementary data:**

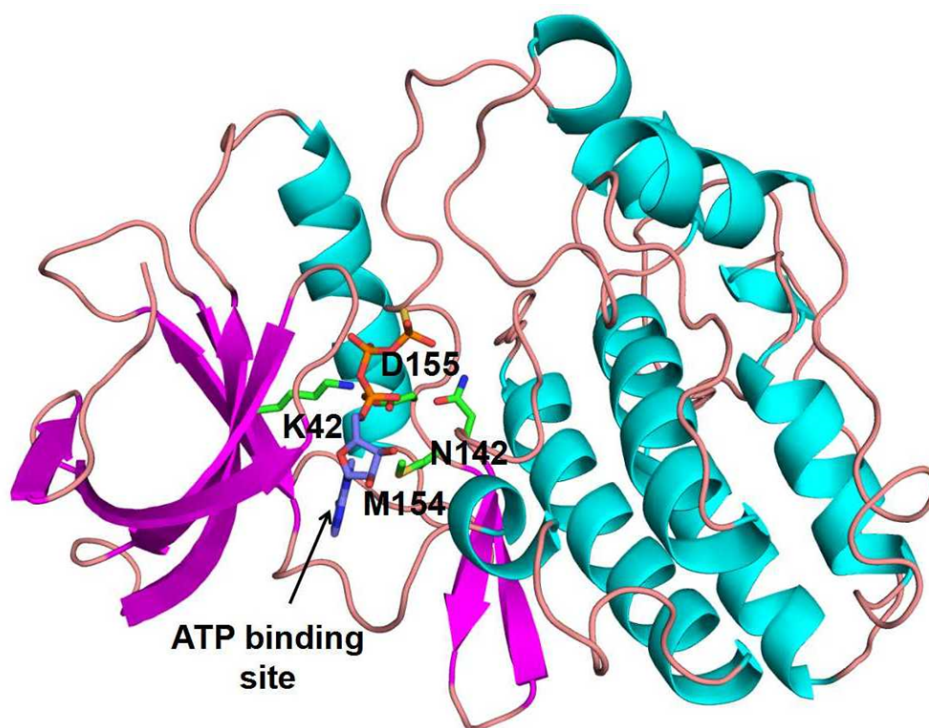

864

865 **Figure S1:** 3-dimensional structural model of kinase domain of RqkA with the predicted  
866 ATP binding site.

867

868

869

870

871

872

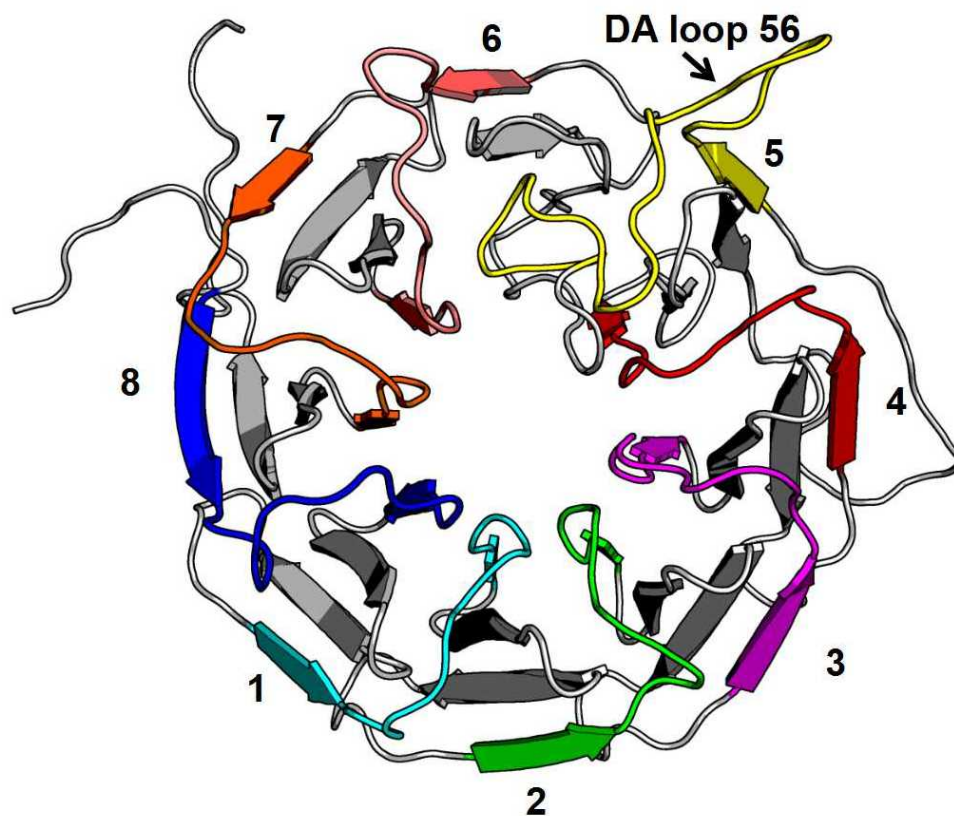

873

874 **Figure S2:**  $\beta$ -propeller blades constitute anti-parallel four  $\beta$ -sheets. Each  $\beta$ -propeller blades  
875 linked together with DA loop shown in different colors. DA loop connecting b 5 and 6 is  
876 longer and shown in yellow.

877

878

879

880

881

882

883



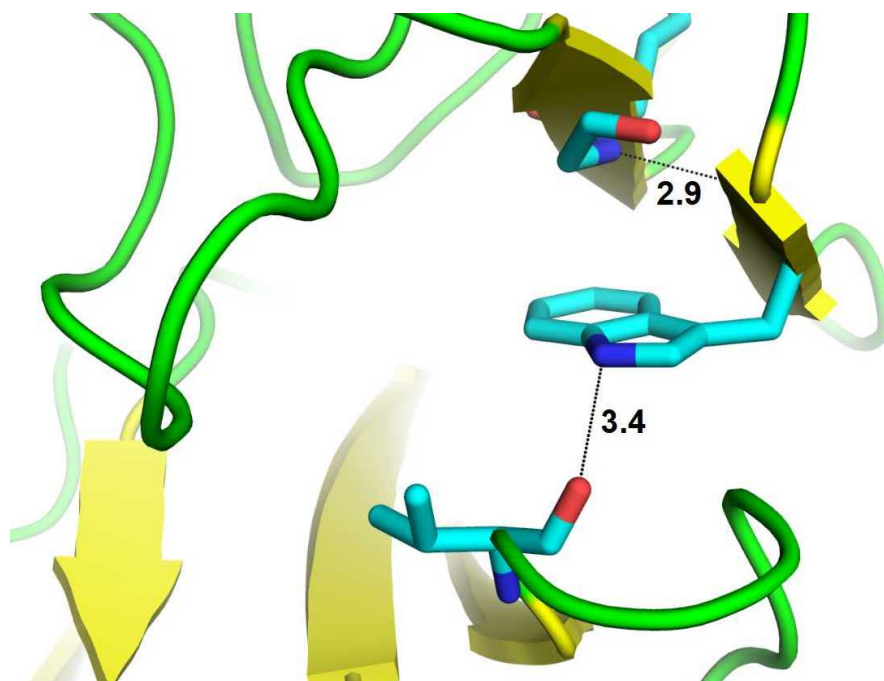

884

885

886

887 **Figure S3:** Hydrogen bonding interactions of conserved tryptophan in the D-strand with  
888 neighboring  $\beta$ -strands.

889

890

891

892

893

894

895

896

897

898

899

900

901

902

903

904

905

906  
907  
908  
909  
910  
911  
912  
913  
914  
915  
916  
917  
918  
919  
920  
921  
922  
923  
924
